# Supplementary material for: “Gap hunting” to characterize clustered probe signals in Illumina methylation array data
Source: PubMed Central journal article supplement (PMC5142147; doi:10.1186/s13072-016-0107-z), 2016-12-07

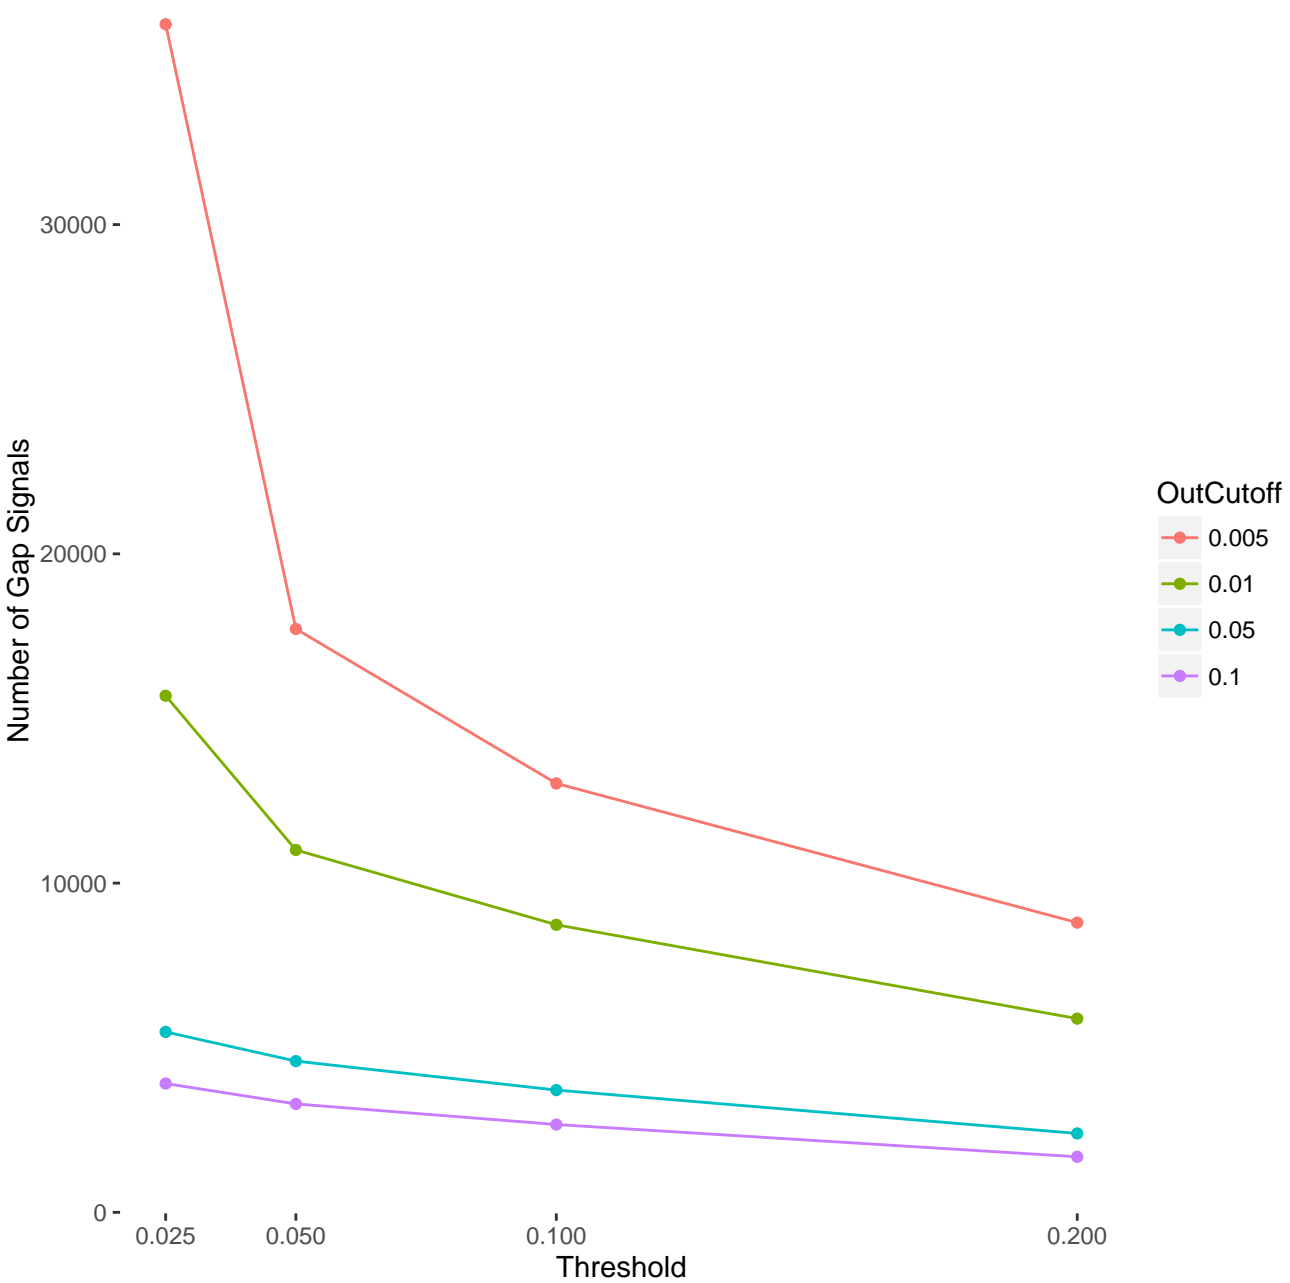

Supplement: 13072_2016_107_MOESM1_ESM.pdf [file 13072_2016_107_MOESM1_ESM.pdf]
