# Supplementary material for: “Gap hunting” to characterize clustered probe signals in Illumina methylation array data
Source: PubMed Central journal article supplement (PMC5142147; doi:10.1186/s13072-016-0107-z), 2016-12-07
Supplement: 13072_2016_107_MOESM5_ESM.pdf [file 13072_2016_107_MOESM5_ESM.pdf]

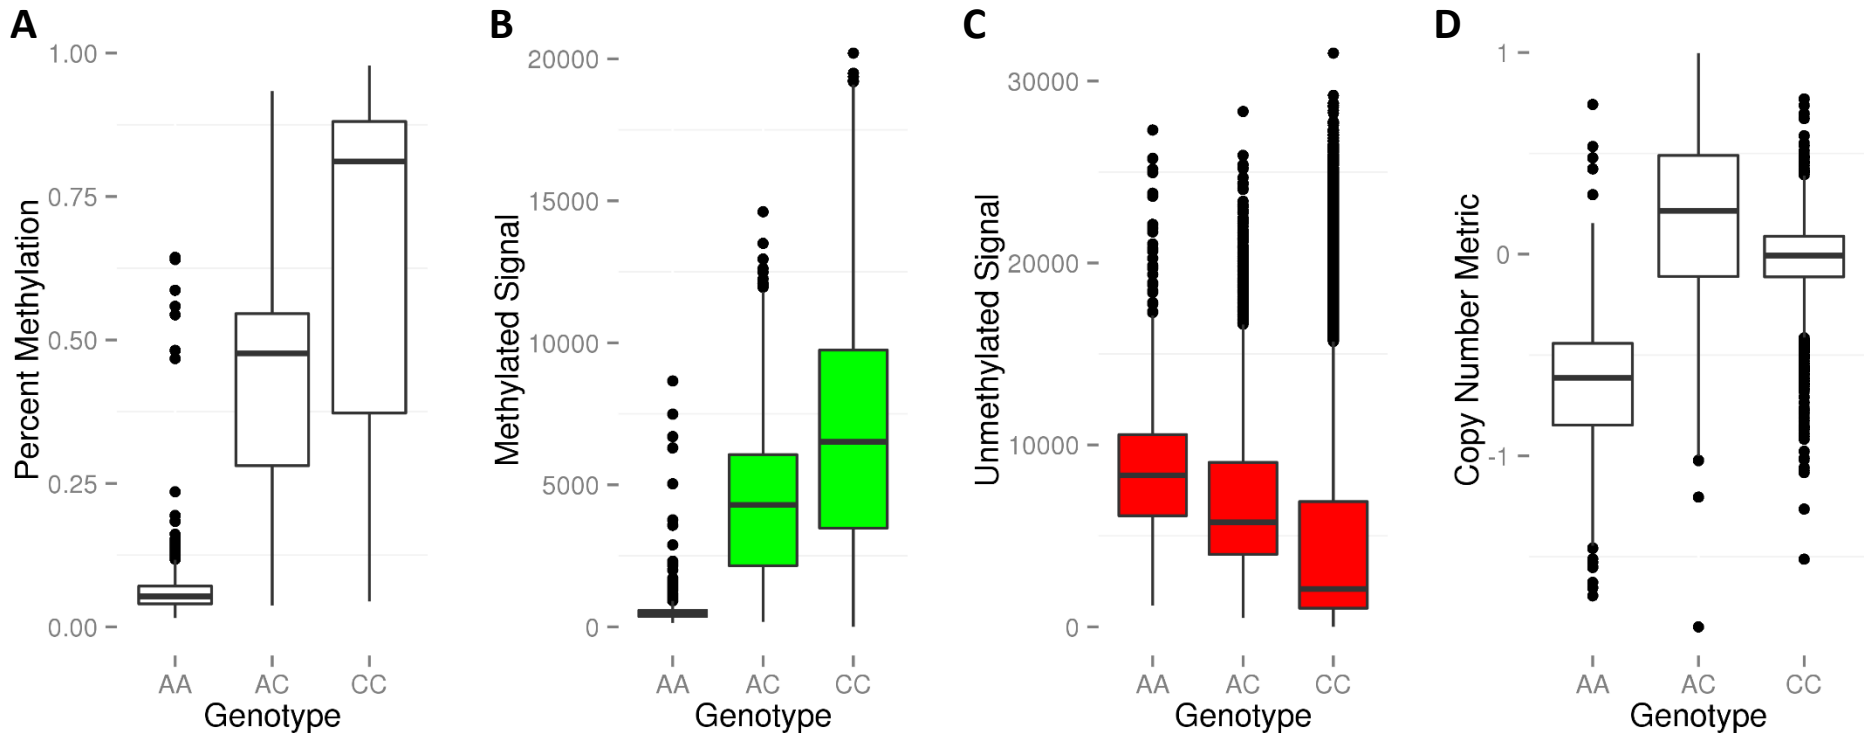

**Figure S3: The effect of a A/C SNP at a forward strand C site of Type II 450k probes on percent methylation, methylated signal, unmethylated signal, and a copy number metric.** 84 probes in SEED were classified in this specific scenario. **Panel A:** Percent methylation (beta value) vs. genotype. **Panel B:** Methylated signal vs genotype. **Panel C:** Unmethylated signal vs genotype. **Panel D:** Copy number metric (see Methods for calculation) vs. genotype.

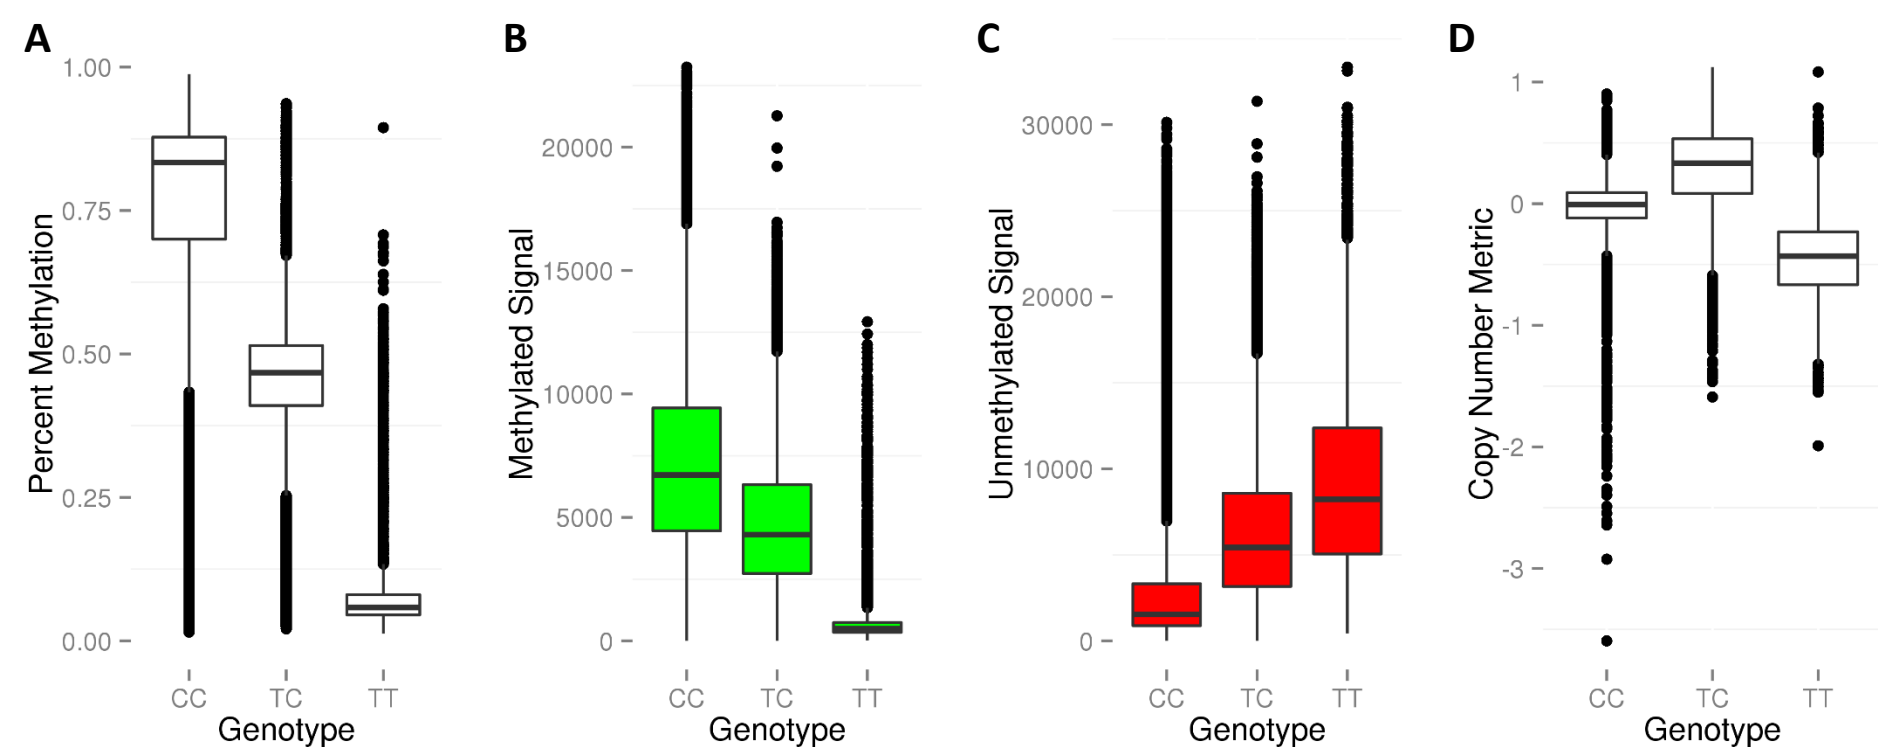

**Figure S4: The effect of a T/C SNP at a forward strand C site of Type II 450k probes on percent methylation, methylated signal, unmethylated signal, and a copy number metric.** 824 probes in SEED were classified in this specific scenario. **Panel A:** Percent methylation (beta value) vs. genotype. **Panel B:** Methylated signal vs genotype. **Panel C:** Unmethylated signal vs genotype. **Panel D:** Copy number metric (see Methods for calculation) vs. genotype.

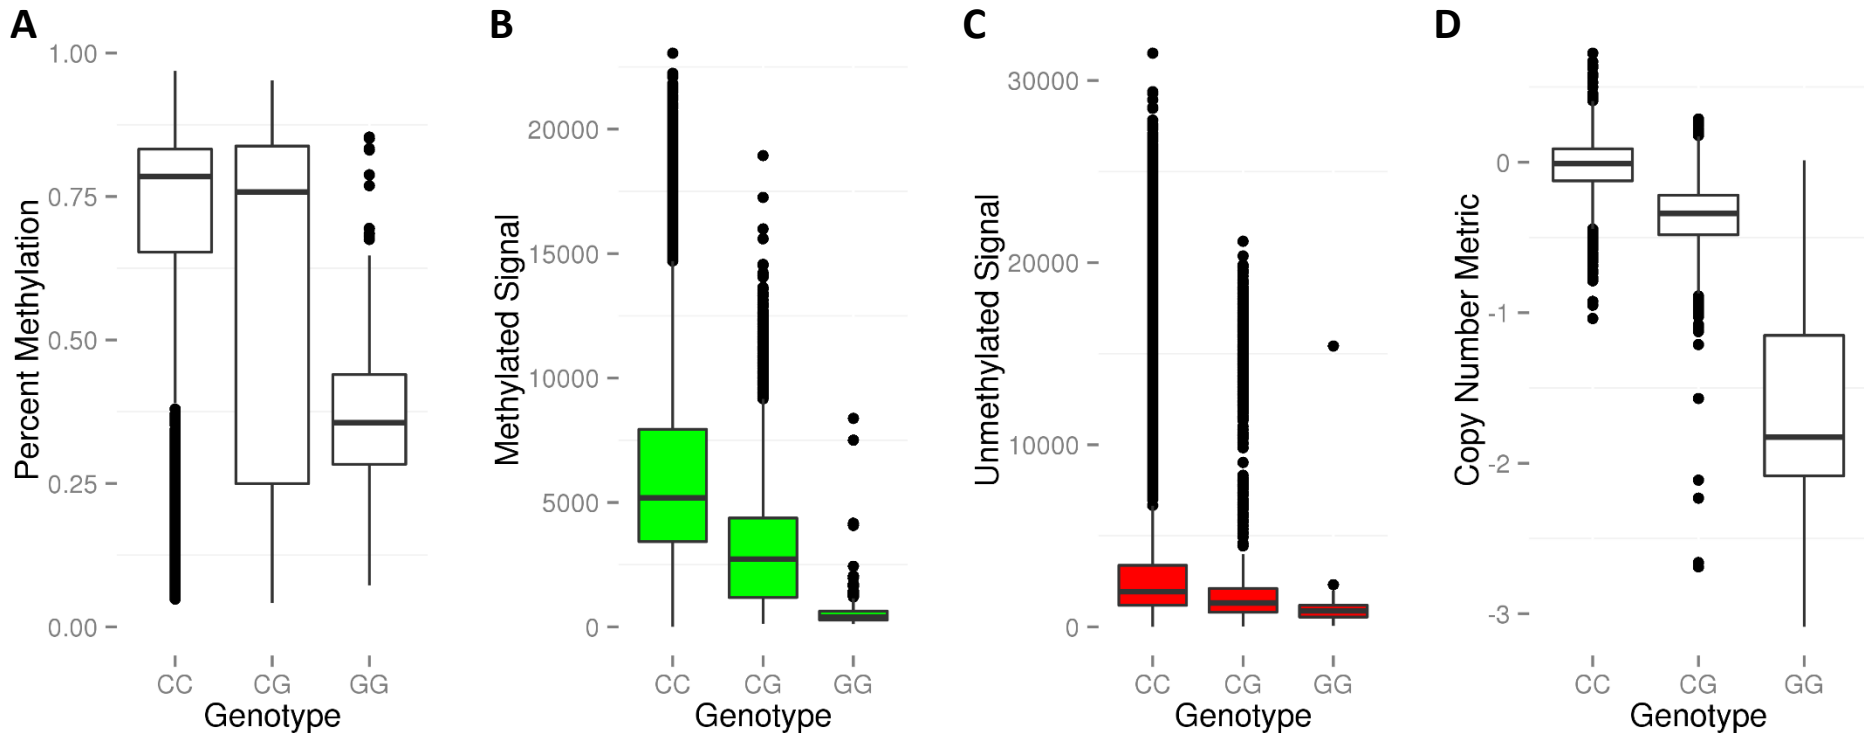

**Figure S5: The effect of a C/G SNP at a reverse strand C site of Type II 450k probes on percent methylation, methylated signal, unmethylated signal, and a copy number metric.** 60 probes in SEED were classified in this specific scenario. **Panel A:** Percent methylation (beta value) vs. genotype. **Panel B:** Methylated signal vs genotype. **Panel C:** Unmethylated signal vs genotype. **Panel D:** Copy number metric (see Methods for calculation) vs. genotype.

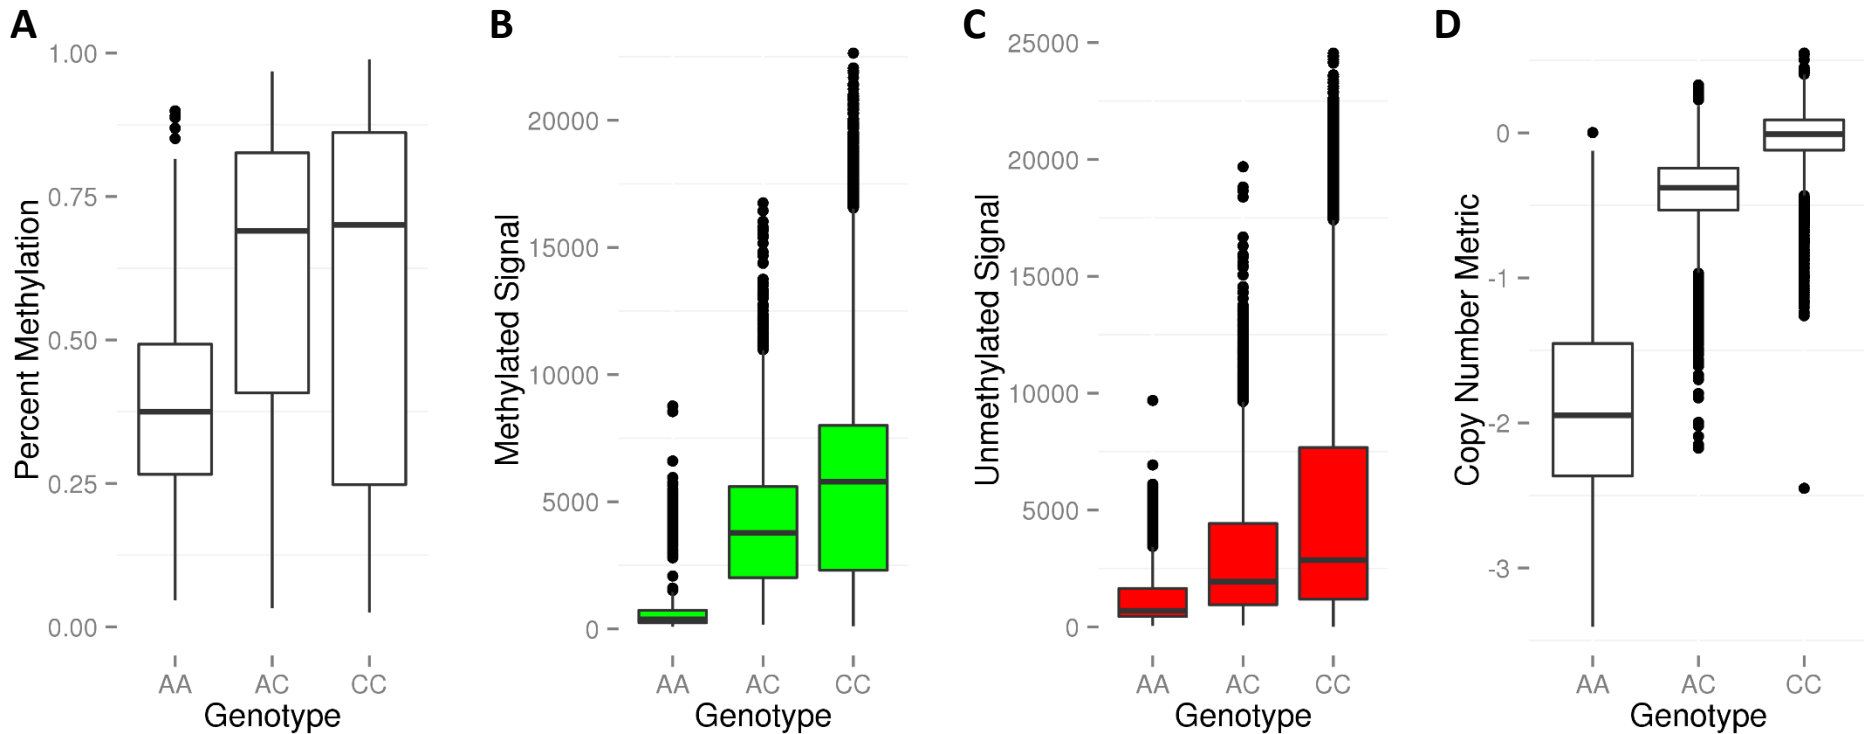

**Figure S6: The effect of a A/C SNP at a reverse strand C site of Type II 450k probes on percent methylation, methylated signal, unmethylated signal, and a copy number metric.** 76 probes in SEED were classified in this specific scenario. **Panel A:** Percent methylation (beta value) vs. genotype. **Panel B:** Methylated signal vs genotype. **Panel C:** Unmethylated signal vs genotype. **Panel D:** Copy number metric (see Methods for calculation) vs. genotype.

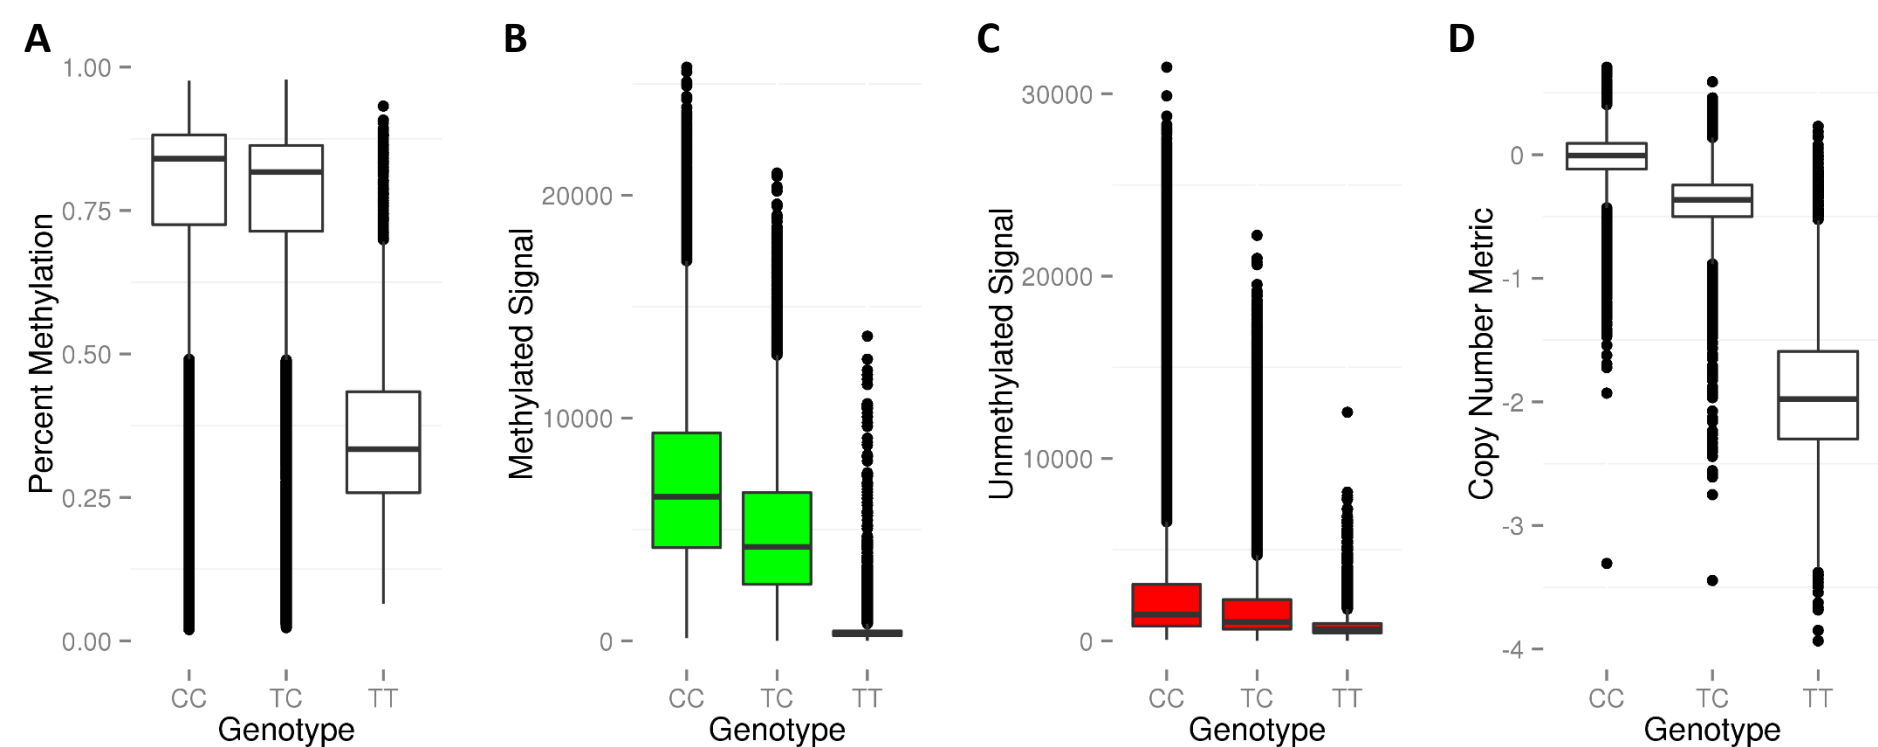

**Figure S7: The effect of a T/C SNP at a reverse strand C site of Type II 450k probes on percent methylation, methylated signal, unmethylated signal, and a copy number metric.** 775 probes in SEED were classified in this specific scenario. **Panel A:** Percent methylation (beta value) vs. genotype. **Panel B:** Methylated signal vs genotype. **Panel C:** Unmethylated signal vs genotype. **Panel D:** Copy number metric (see Methods for calculation) vs. genotype.

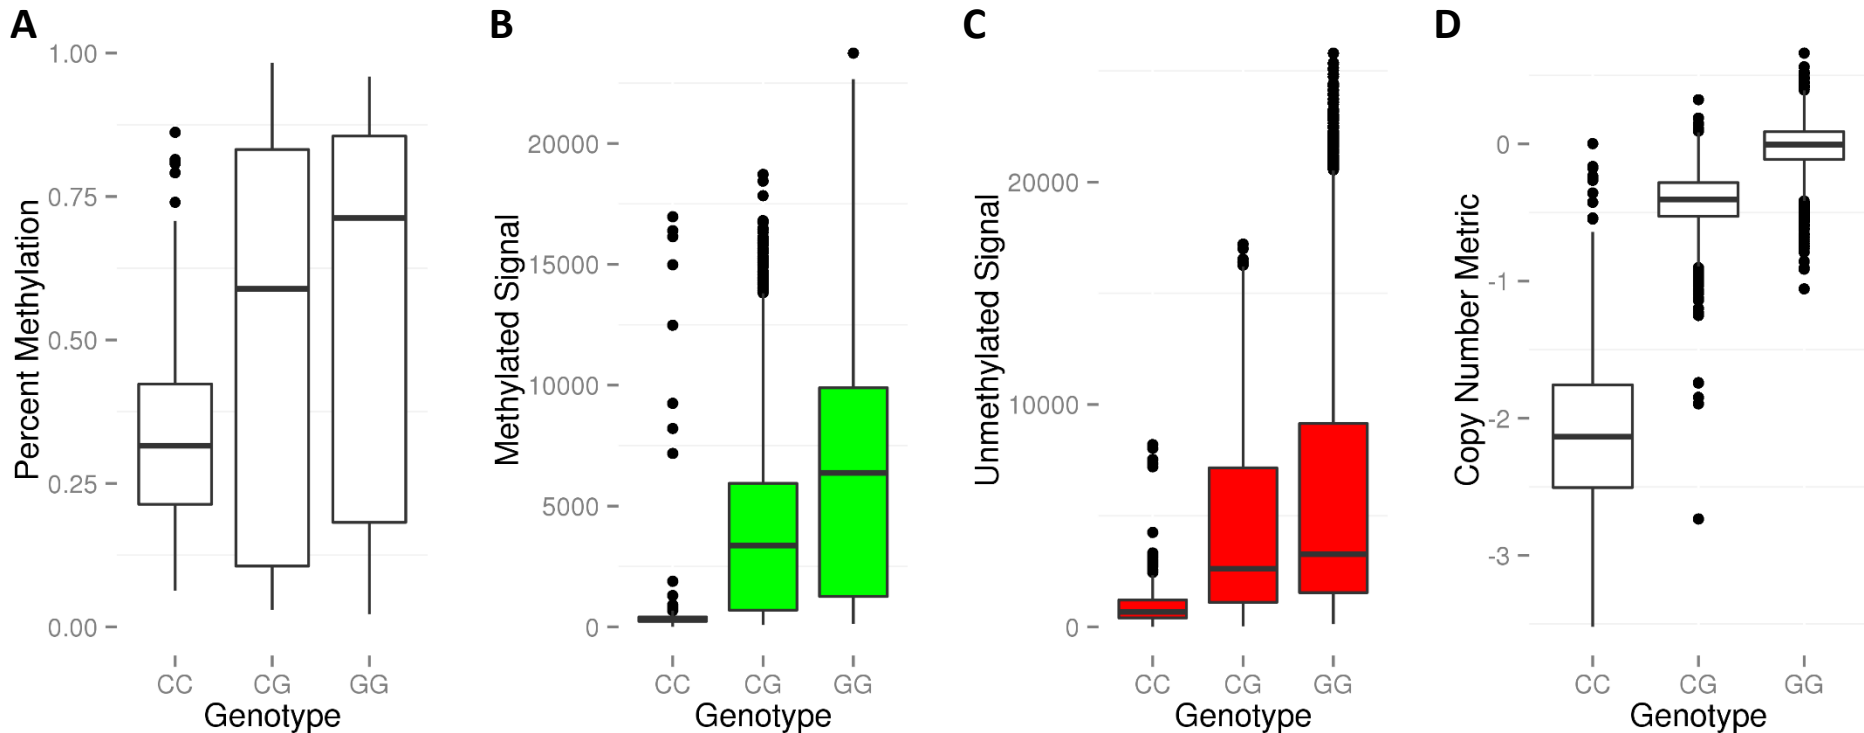

**Figure S8: The effect of a C/G SNP at a forward strand G site of Type II 450k probes on percent methylation, methylated signal, unmethylated signal, and a copy number metric.** 67 probes in SEED were classified in this specific scenario. **Panel A:** Percent methylation (beta value) vs. genotype. **Panel B:** Methylated signal vs genotype. **Panel C:** Unmethylated signal vs genotype. **Panel D:** Copy number metric (see Methods for calculation) vs. genotype.

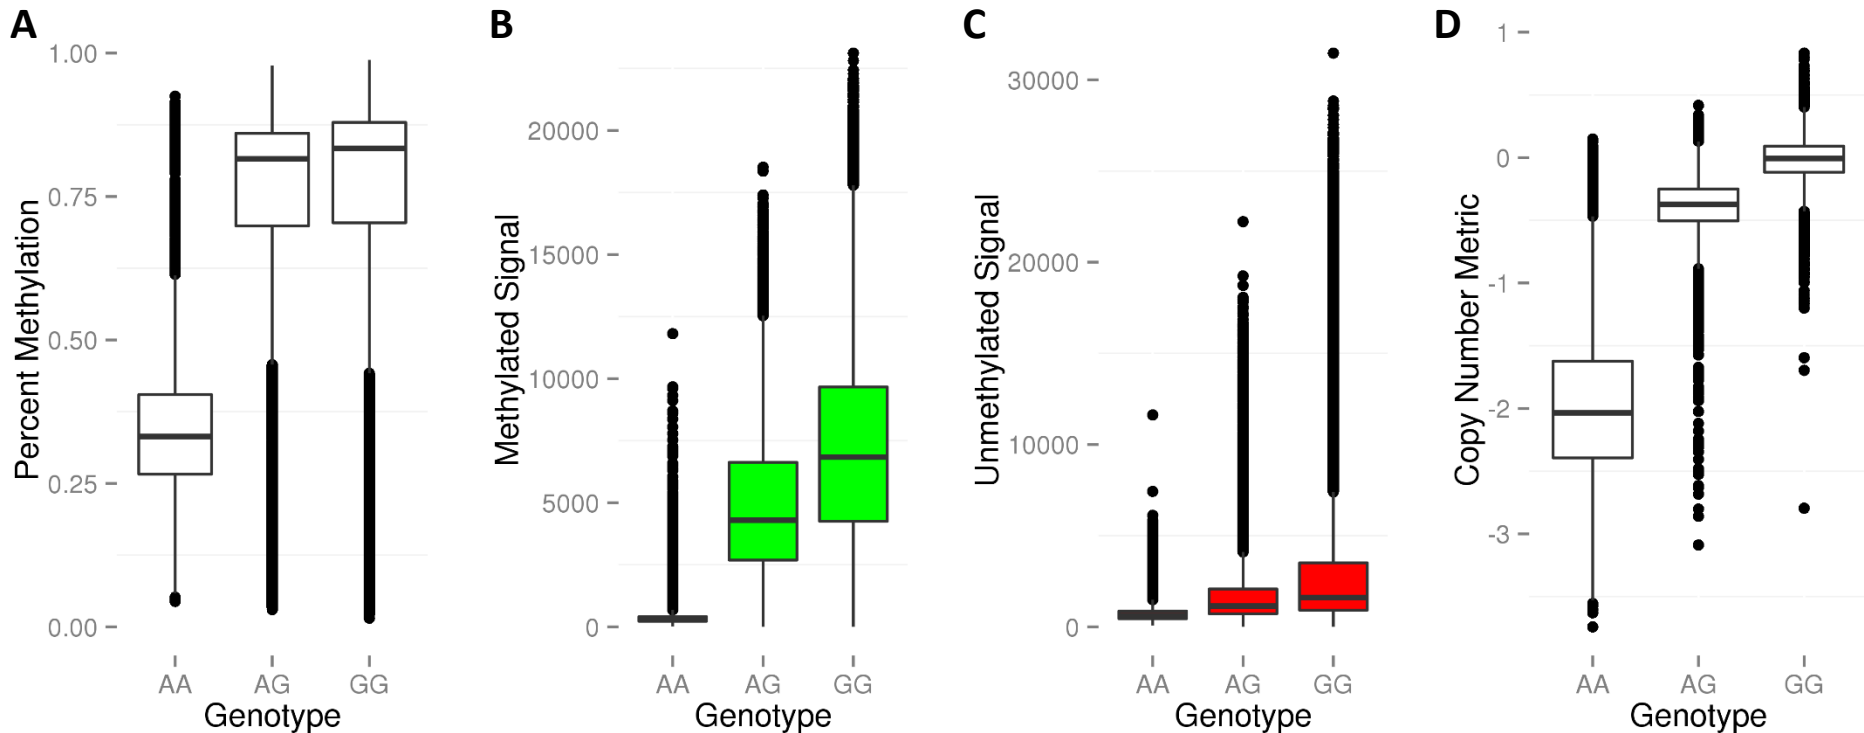

**Figure S9: The effect of a A/G SNP at a forward strand G site of Type II 450k probes on percent methylation, methylated signal, unmethylated signal, and a copy number metric.** 826 probes in SEED were classified in this specific scenario. **Panel A:** Percent methylation (beta value) vs. genotype. **Panel B:** Methylated signal vs genotype. **Panel C:** Unmethylated signal vs genotype. **Panel D:** Copy number metric (see Methods for calculation) vs. genotype.

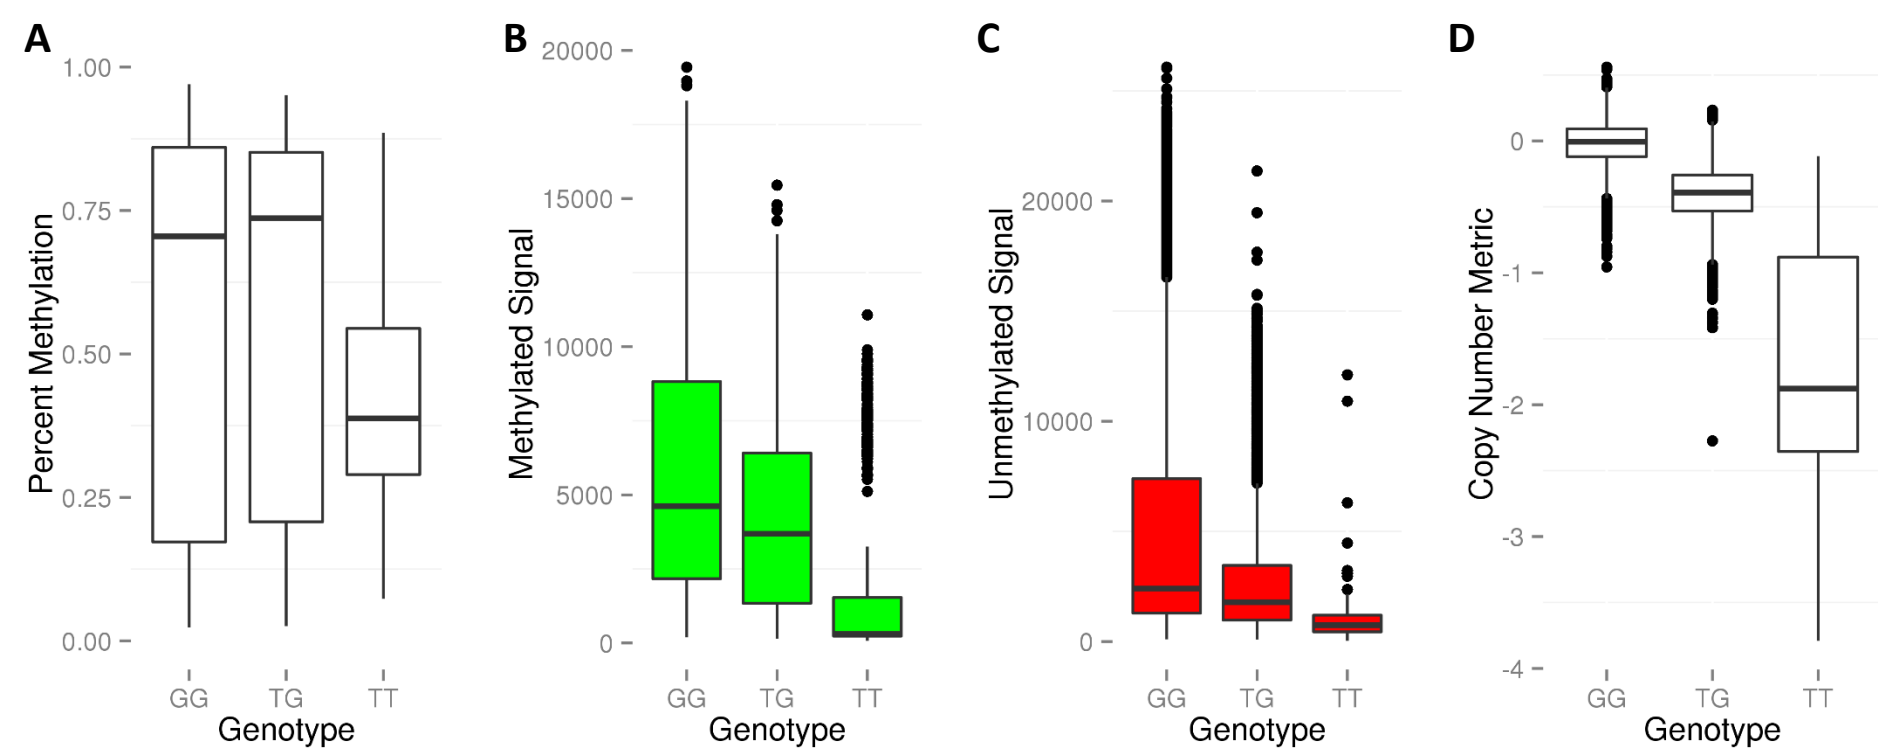

**Figure S10: The effect of a T/G SNP at a forward strand G site of Type II 450k probes on percent methylation, methylated signal, unmethylated signal, and a copy number metric.** 67 probes in SEED were classified in this specific scenario. **Panel A:** Percent methylation (beta value) vs. genotype. **Panel B:** Methylated signal vs genotype. **Panel C:** Unmethylated signal vs genotype. **Panel D:** Copy number metric (see Methods for calculation) vs. genotype.



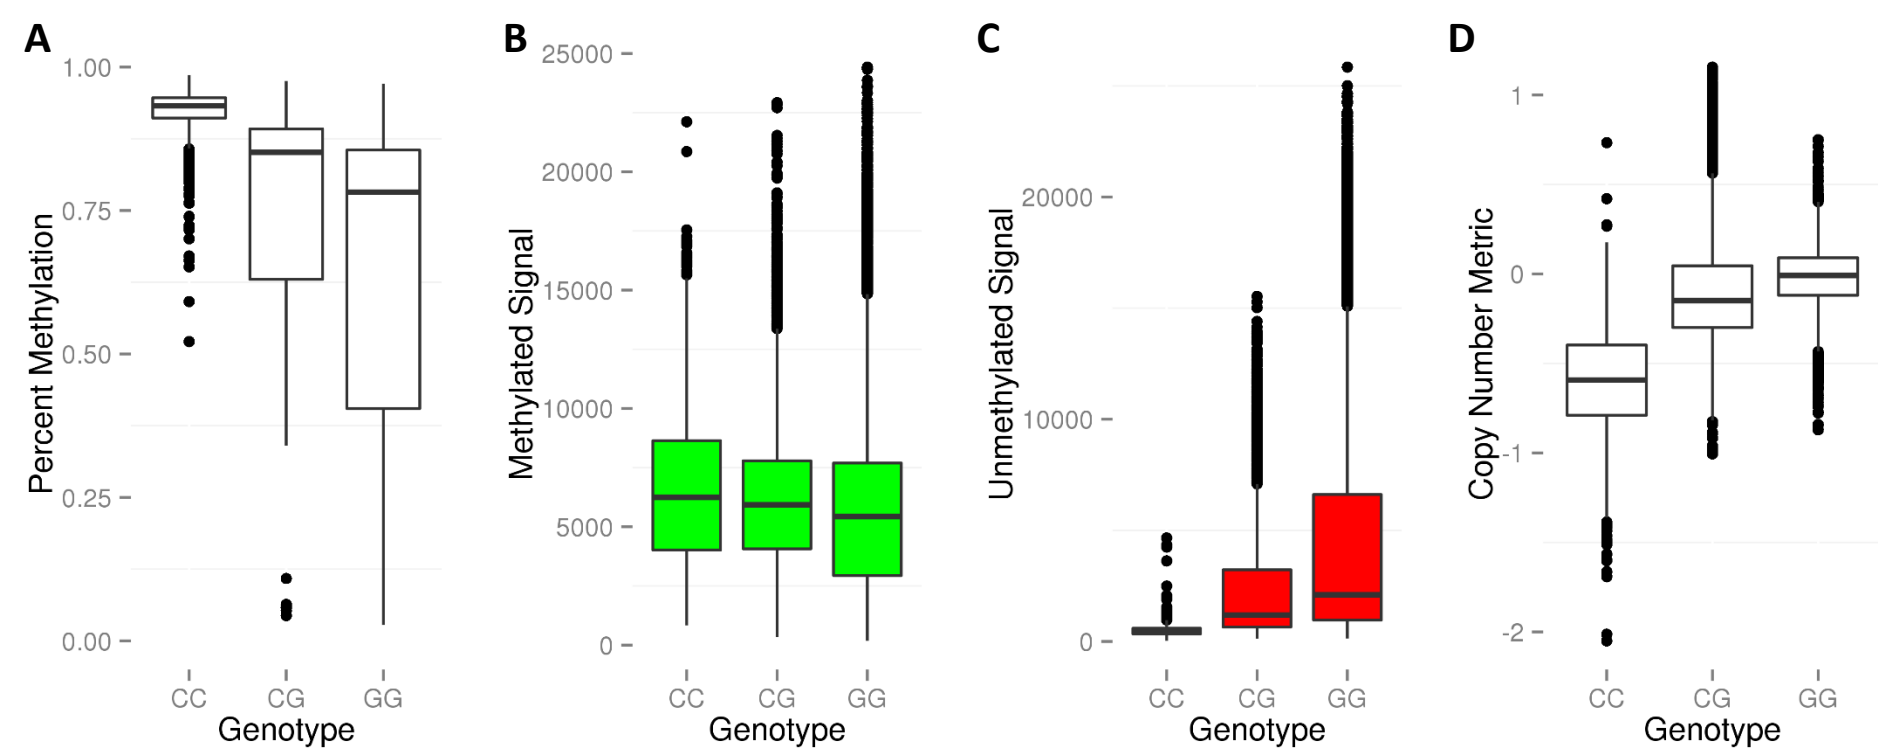

**Figure S11: The effect of a C/G SNP at a negative strand G site of Type II 450k probes on percent methylation, methylated signal, unmethylated signal, and a copy number metric. 95 probes in SEED were classified in this specific scenario. **Panel A:** Percent methylation (beta value) vs. genotype. **Panel B:** Methylated signal vs genotype. **Panel C:** Unmethylated signal vs genotype. **Panel D:** Copy number metric (see Methods for calculation) vs. genotype.**

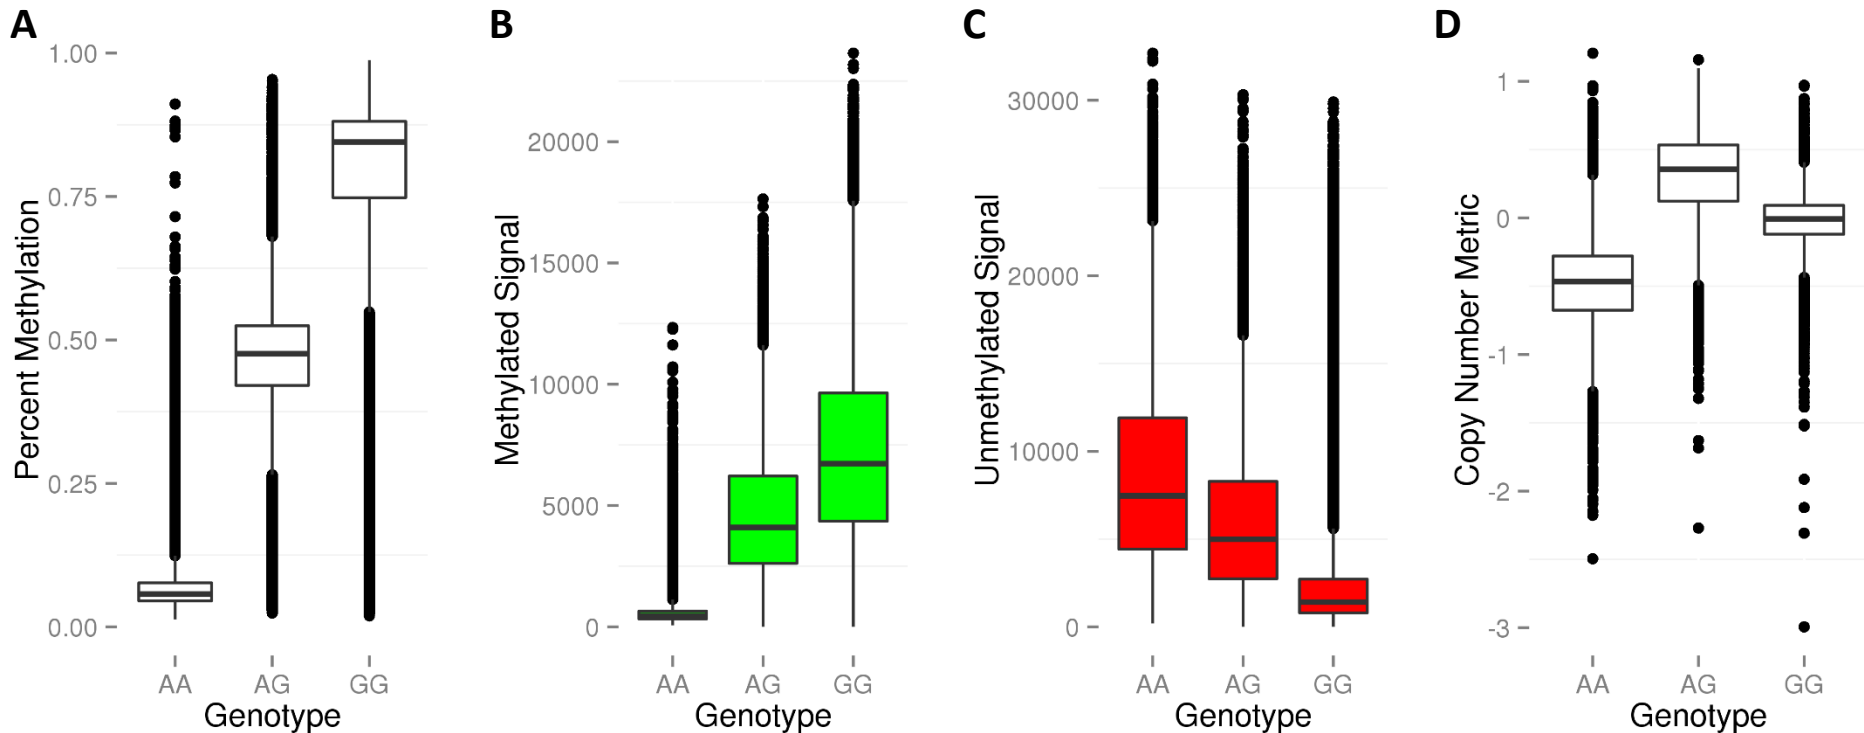

**Figure S12: The effect of a A/G SNP at a negative strand G site of Type II 450k probes on percent methylation, methylated signal, unmethylated signal, and a copy number metric.** 1258 probes in SEED were classified in this specific scenario. **Panel A:** Percent methylation (beta value) vs. genotype. **Panel B:** Methylated signal vs genotype. **Panel C:** Unmethylated signal vs genotype. **Panel D:** Copy number metric (see Methods for calculation) vs. genotype.

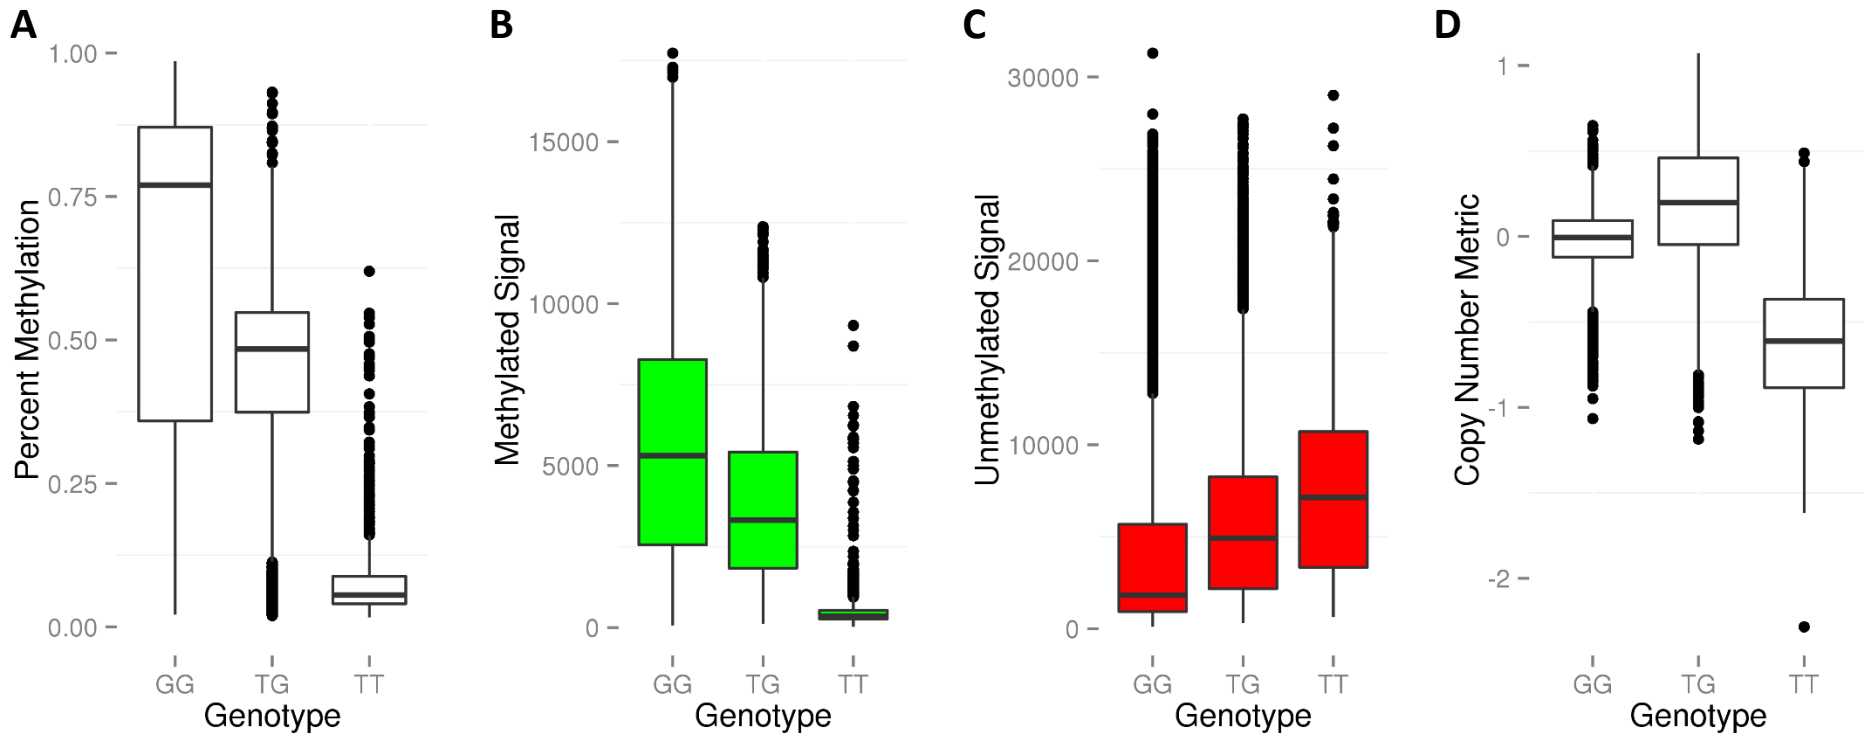

**Figure S13: The effect of a T/G SNP at a negative strand G site of Type II 450k probes on percent methylation, methylated signal, unmethylated signal, and a copy number metric.** 131 probes in SEED were classified in this specific scenario. **Panel A:** Percent methylation (beta value) vs. genotype. **Panel B:** Methylated signal vs genotype. **Panel C:** Unmethylated signal vs genotype. **Panel D:** Copy number metric (see Methods for calculation) vs. genotype.

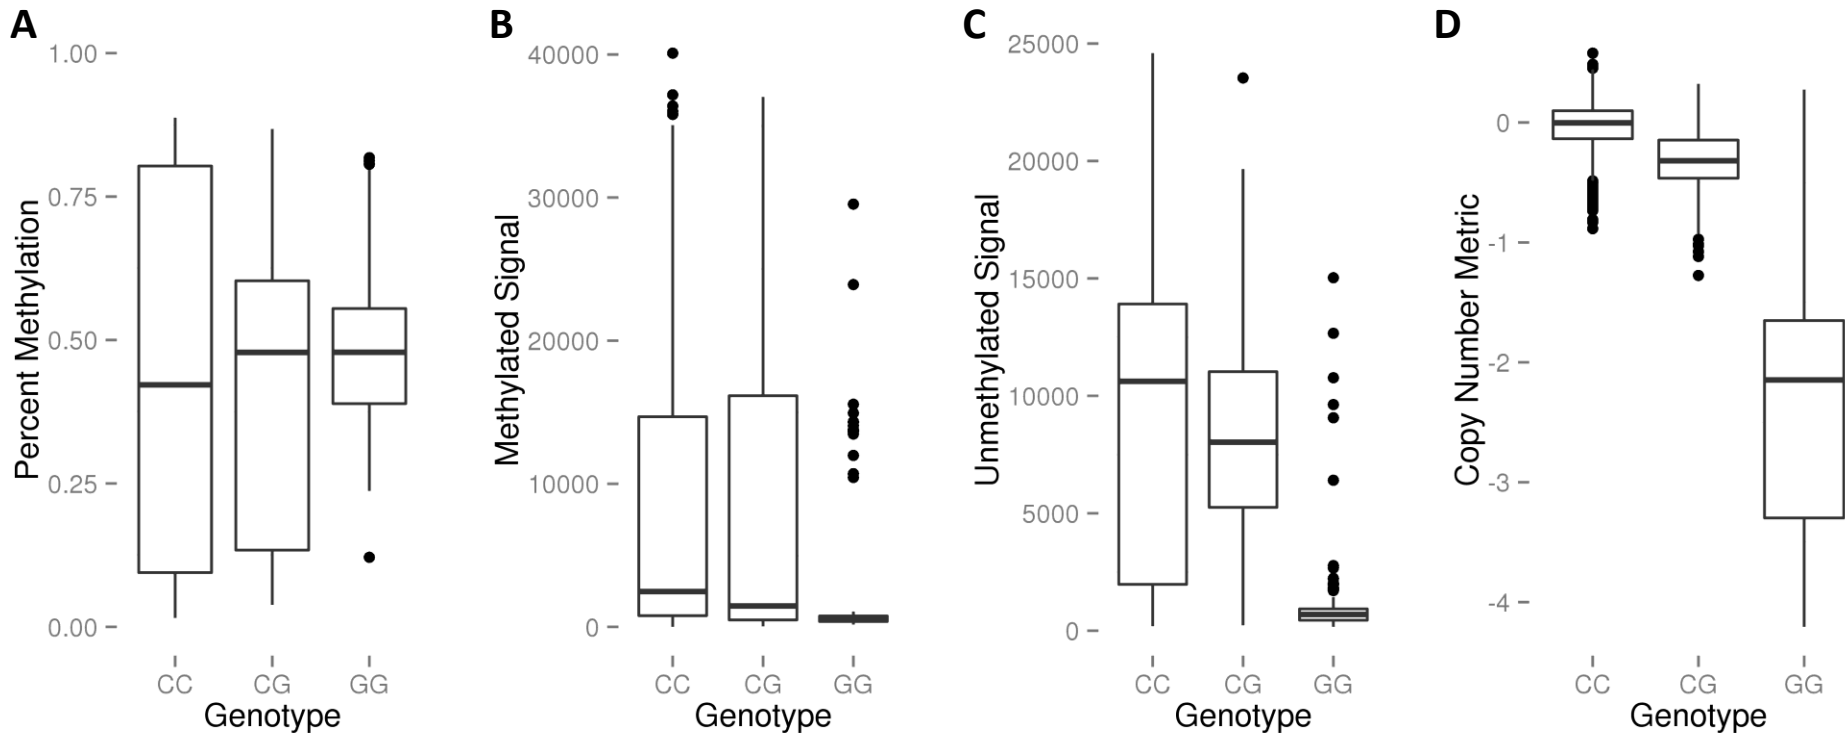

**Figure S14: The effect of a C/G SNP at a positive strand C site of Type I 450k probes on percent methylation, methylated signal, unmethylated signal, and a copy number metric. 23 probes in SEED were classified in this specific scenario. **Panel A:** Percent methylation (beta value) vs. genotype. **Panel B:** Methylated signal vs genotype. **Panel C:** Unmethylated signal vs genotype. **Panel D:** Copy number metric (see Methods for calculation) vs. genotype.**

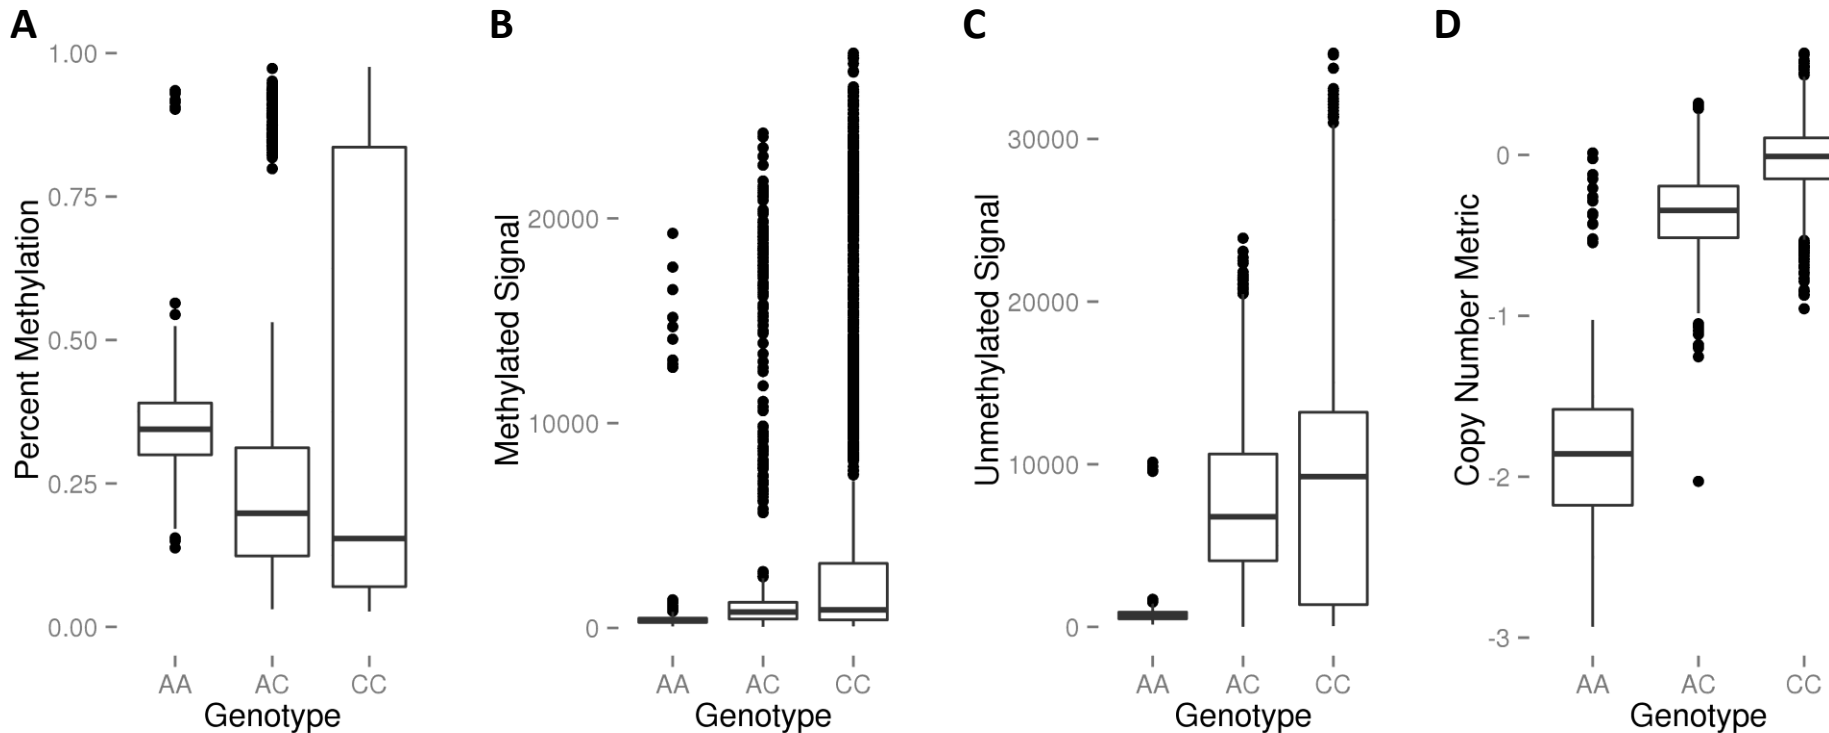

**Figure S15: The effect of a A/C SNP at a positive strand C site of Type I 450k probes on percent methylation, methylated signal, unmethylated signal, and a copy number metric. 30 probes in SEED were classified in this specific scenario. **Panel A:** Percent methylation (beta value) vs. genotype. **Panel B:** Methylated signal vs genotype. **Panel C:** Unmethylated signal vs genotype. **Panel D:** Copy number metric (see Methods for calculation) vs. genotype.**

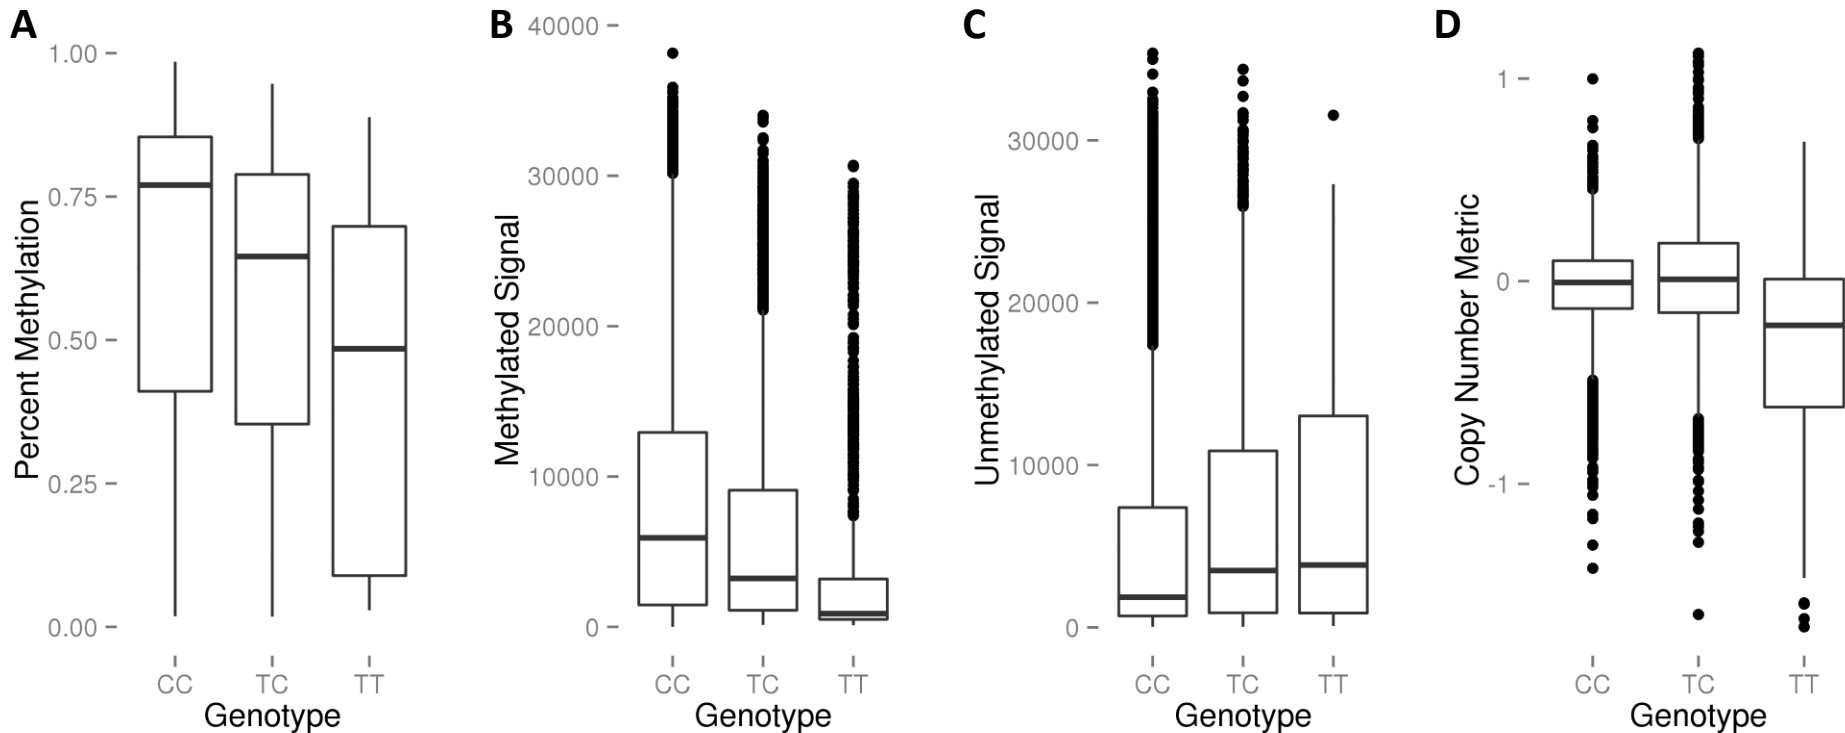

**Figure S16: The effect of a T/C SNP at a positive strand C site of Type I 450k probes on percent methylation, methylated signal, unmethylated signal, and a copy number metric.** 138 probes in SEED were classified in this specific scenario. **Panel A:** Percent methylation (beta value) vs. genotype. **Panel B:** Methylated signal vs genotype. **Panel C:** Unmethylated signal vs genotype. **Panel D:** Copy number metric (see Methods for calculation) vs. genotype.

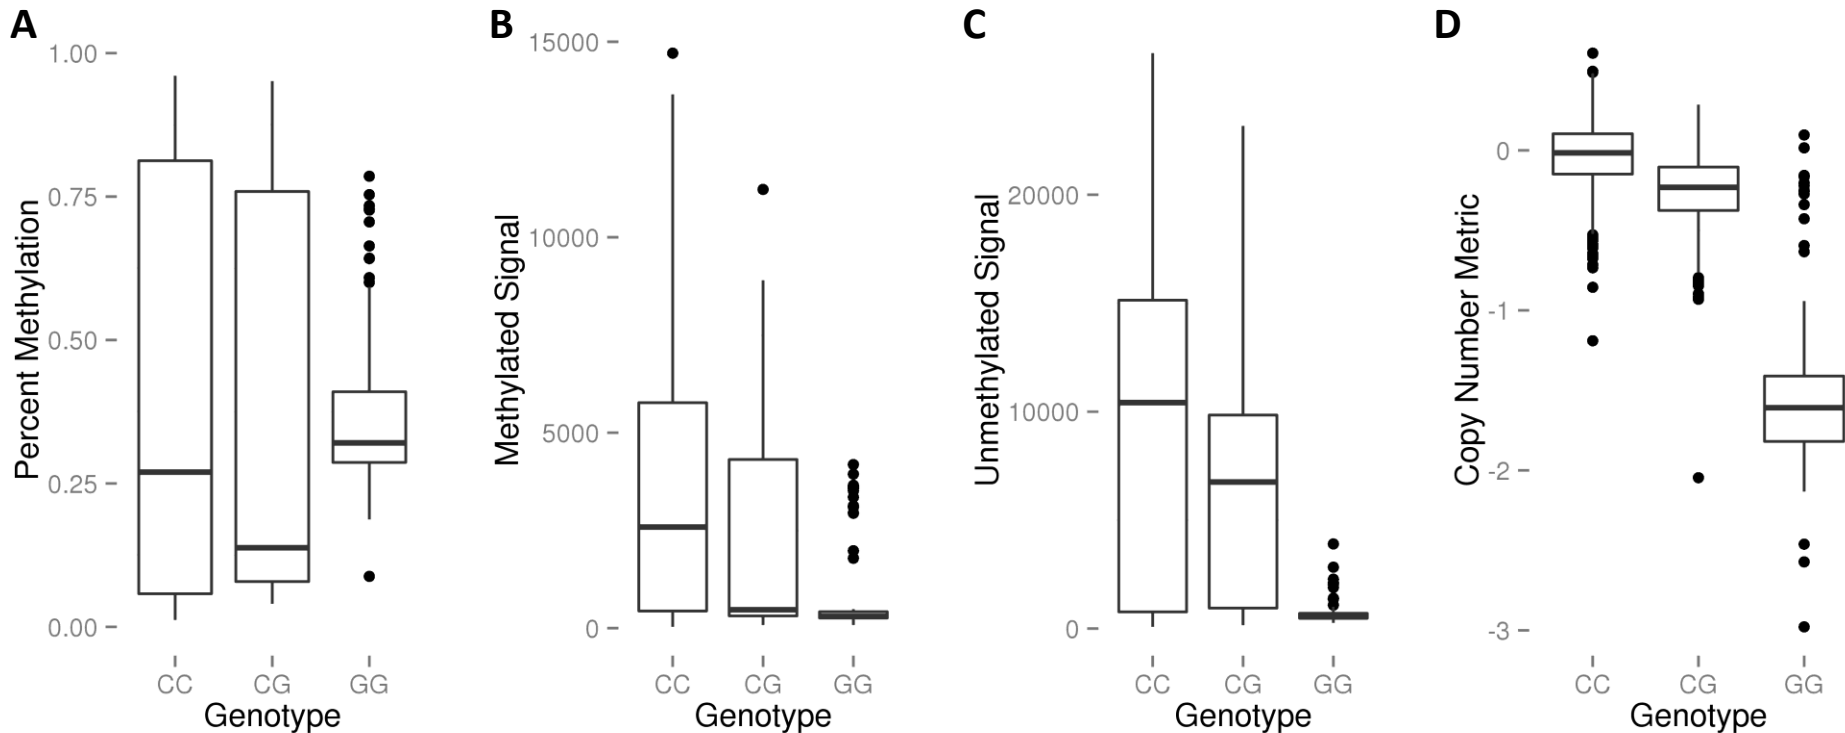

**Figure S17: The effect of a C/G SNP at a negative strand C site of Type I 450k probes on percent methylation, methylated signal, unmethylated signal, and a copy number metric.** 20 probes in SEED were classified in this specific scenario. **Panel A:** Percent methylation (beta value) vs. genotype. **Panel B:** Methylated signal vs genotype. **Panel C:** Unmethylated signal vs genotype. **Panel D:** Copy number metric (see Methods for calculation) vs. genotype.

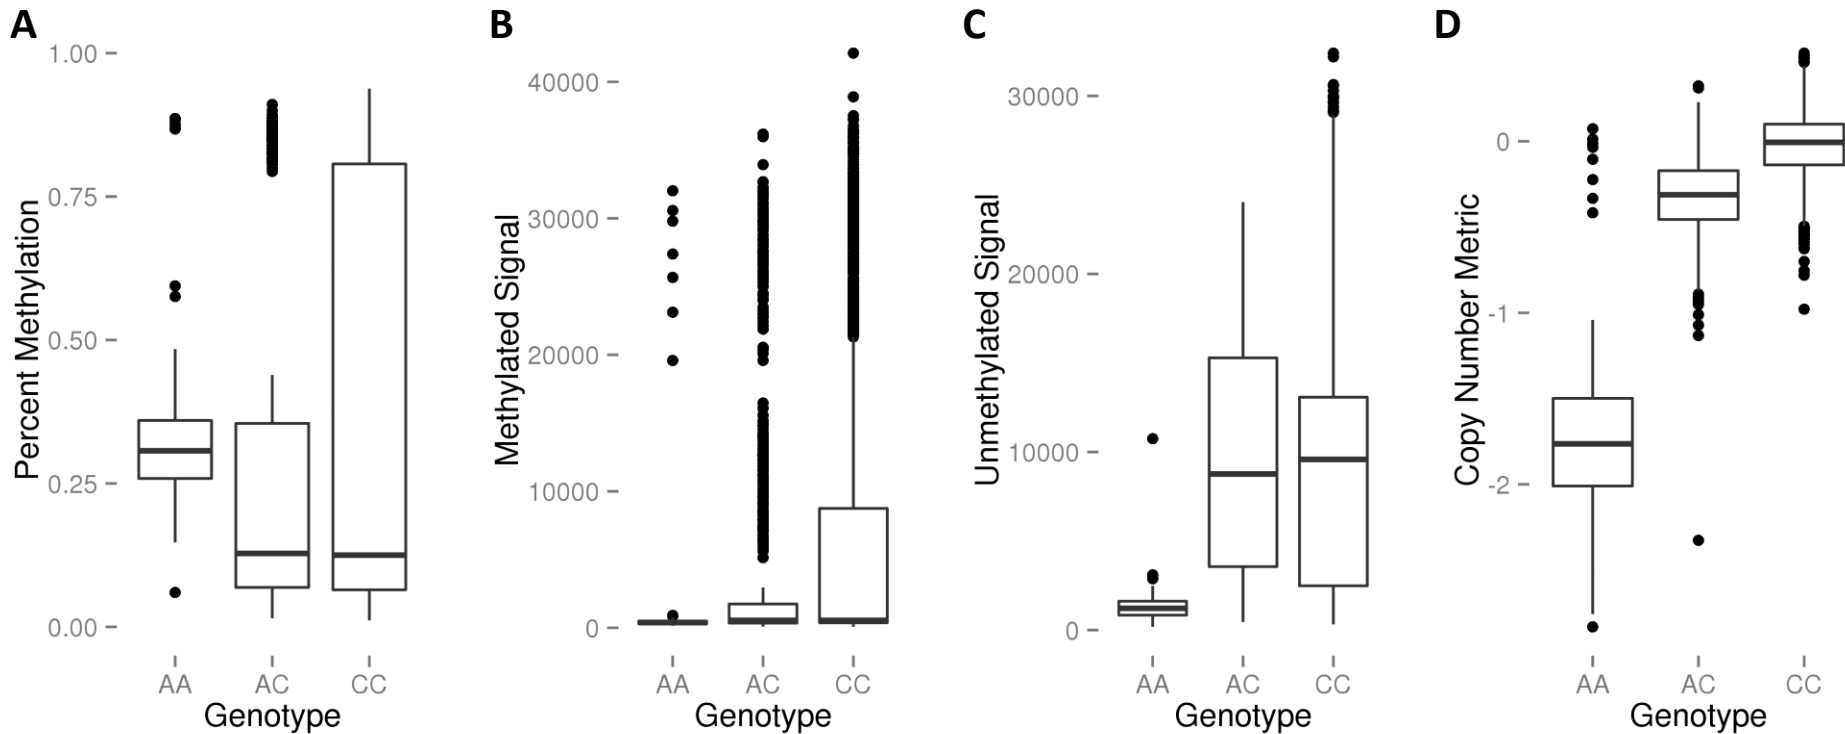

**Figure S18: The effect of a A/C SNP at a negative strand C site of Type I 450k probes on percent methylation, methylated signal, unmethylated signal, and a copy number metric. 29 probes in SEED were classified in this specific scenario. **Panel A:** Percent methylation (beta value) vs. genotype. **Panel B:** Methylated signal vs genotype. **Panel C:** Unmethylated signal vs genotype. **Panel D:** Copy number metric (see Methods for calculation) vs. genotype.**



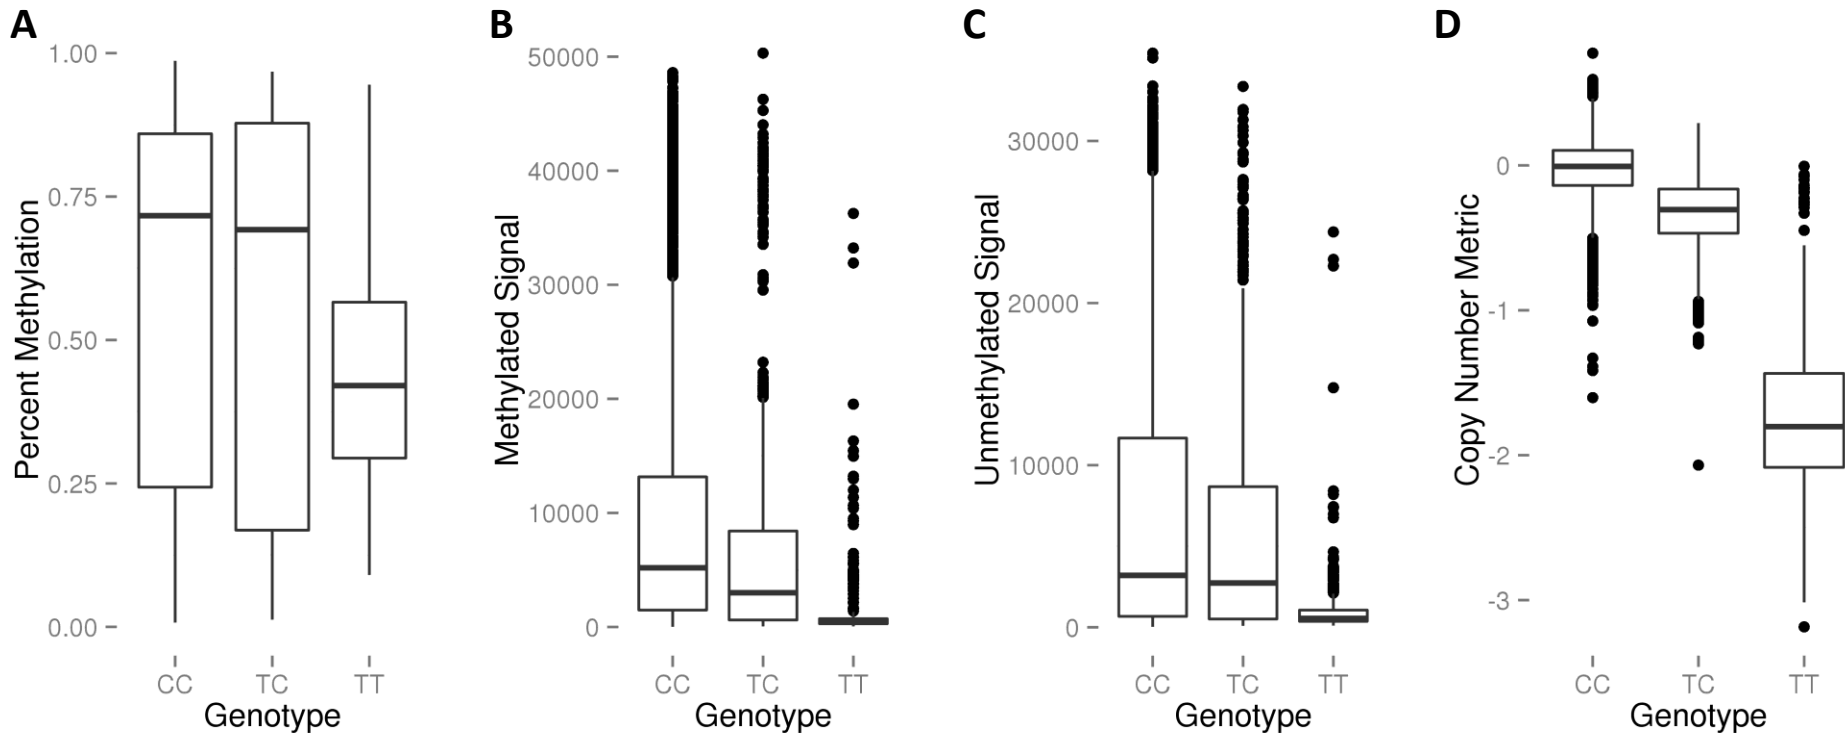

**Figure S19: The effect of a T/C SNP at a negative strand C site of Type I 450k probes on percent methylation, methylated signal, unmethylated signal, and a copy number metric.** 115 probes in SEED were classified in this specific scenario. **Panel A:** Percent methylation (beta value) vs. genotype. **Panel B:** Methylated signal vs genotype. **Panel C:** Unmethylated signal vs genotype. **Panel D:** Copy number metric (see Methods for calculation) vs. genotype.

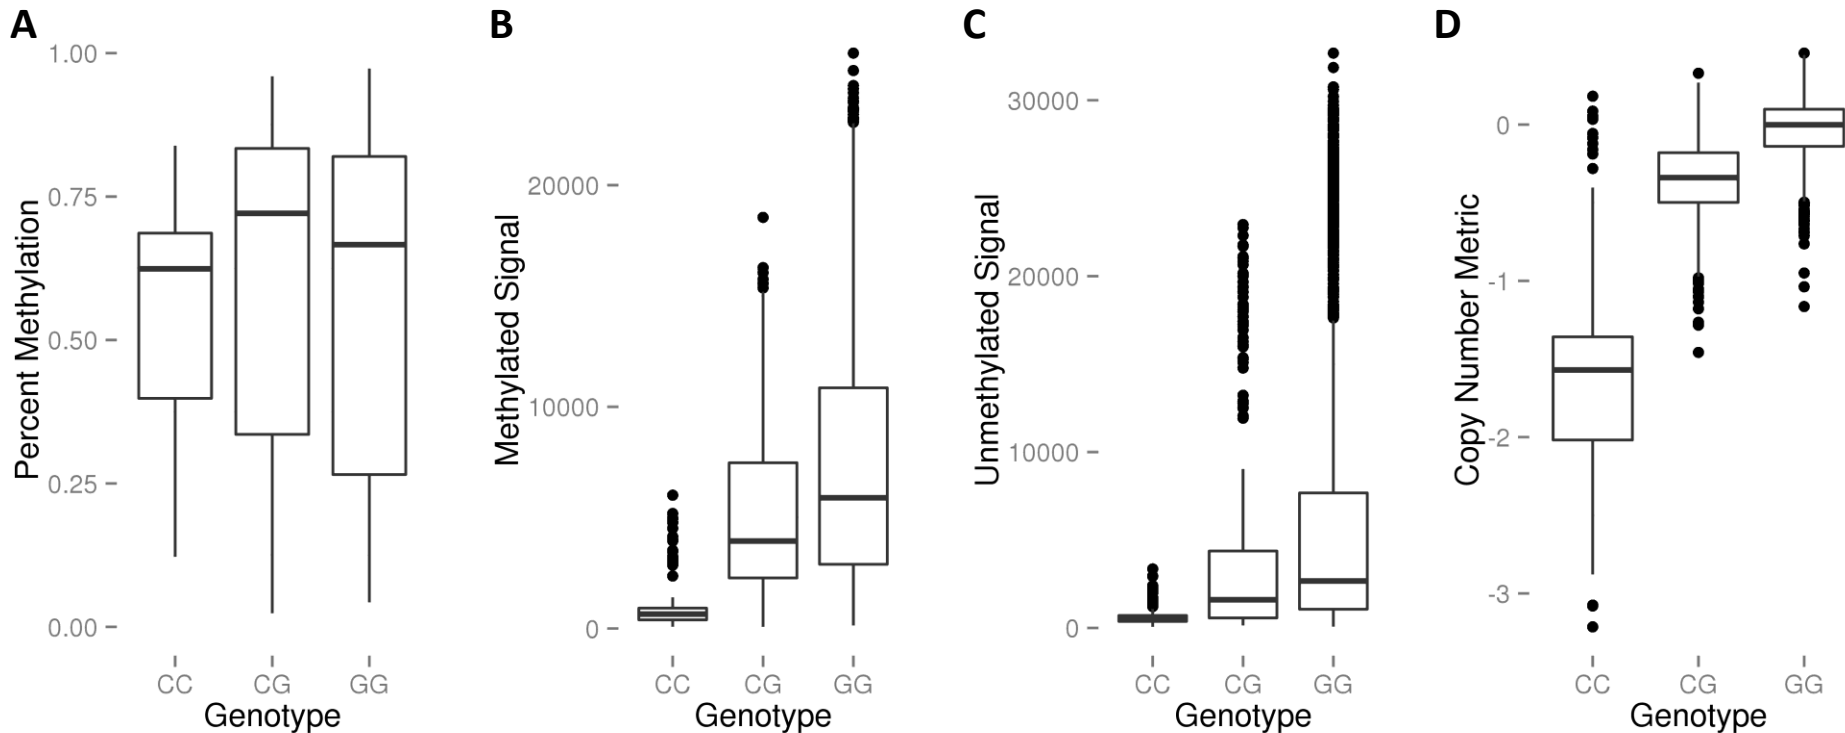

**Figure S20: The effect of a C/G SNP at a positive strand G site of Type I 450k probes on percent methylation, methylated signal, unmethylated signal, and a copy number metric.** 24 probes in SEED were classified in this specific scenario. **Panel A:** Percent methylation (beta value) vs. genotype. **Panel B:** Methylated signal vs genotype. **Panel C:** Unmethylated signal vs genotype. **Panel D:** Copy number metric (see Methods for calculation) vs. genotype.

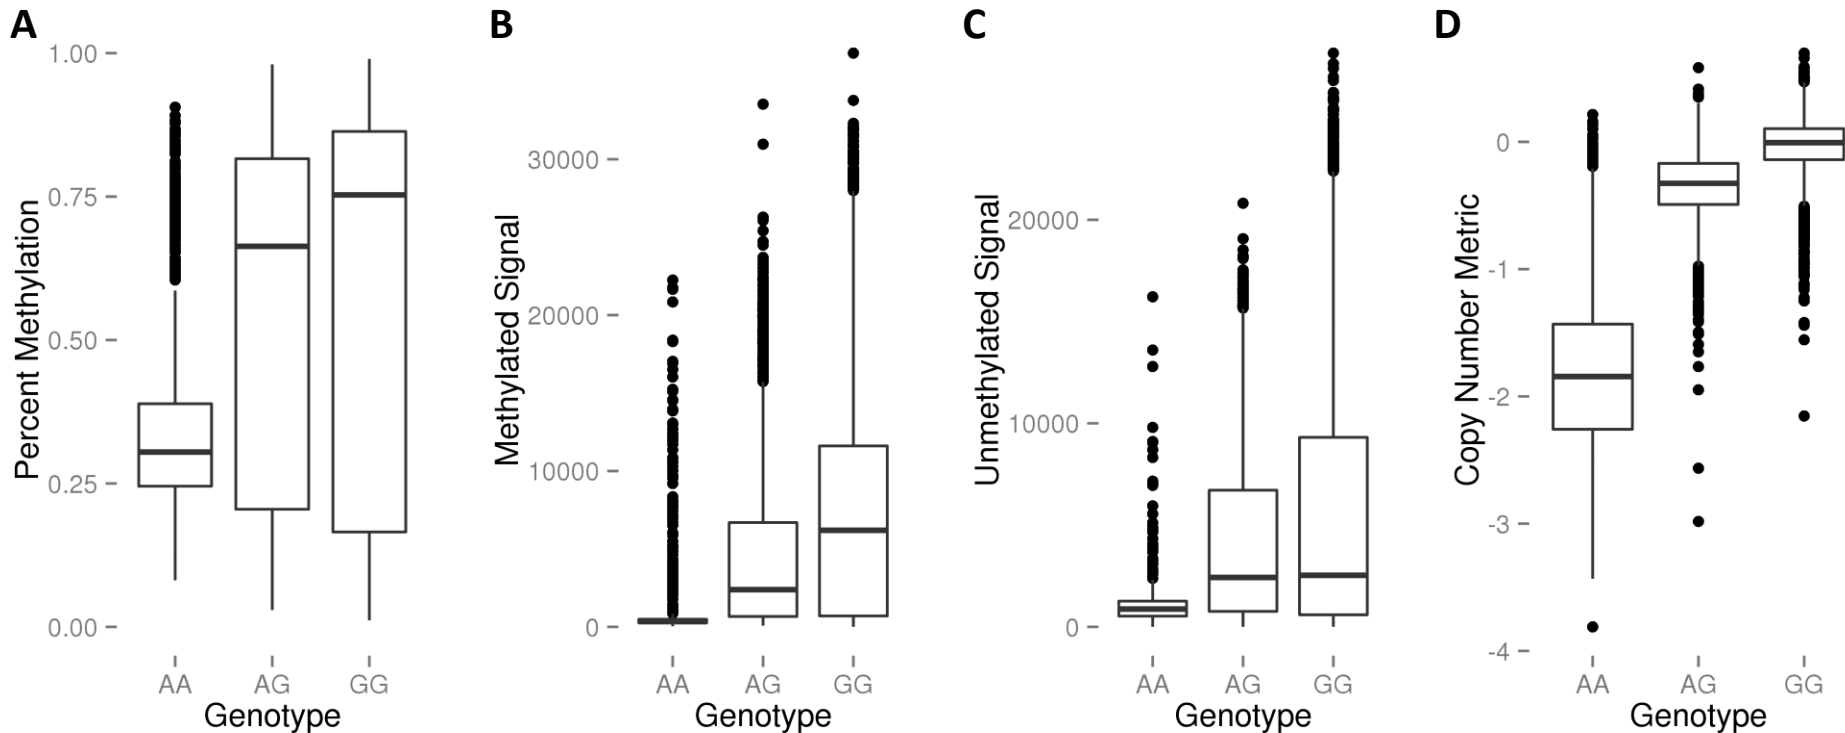

**Figure S21: The effect of a A/G SNP at a positive strand G site of Type I 450k probes on percent methylation, methylated signal, unmethylated signal, and a copy number metric.** 145 probes in SEED were classified in this specific scenario. **Panel A:** Percent methylation (beta value) vs. genotype. **Panel B:** Methylated signal vs genotype. **Panel C:** Unmethylated signal vs genotype. **Panel D:** Copy number metric (see Methods for calculation) vs. genotype.

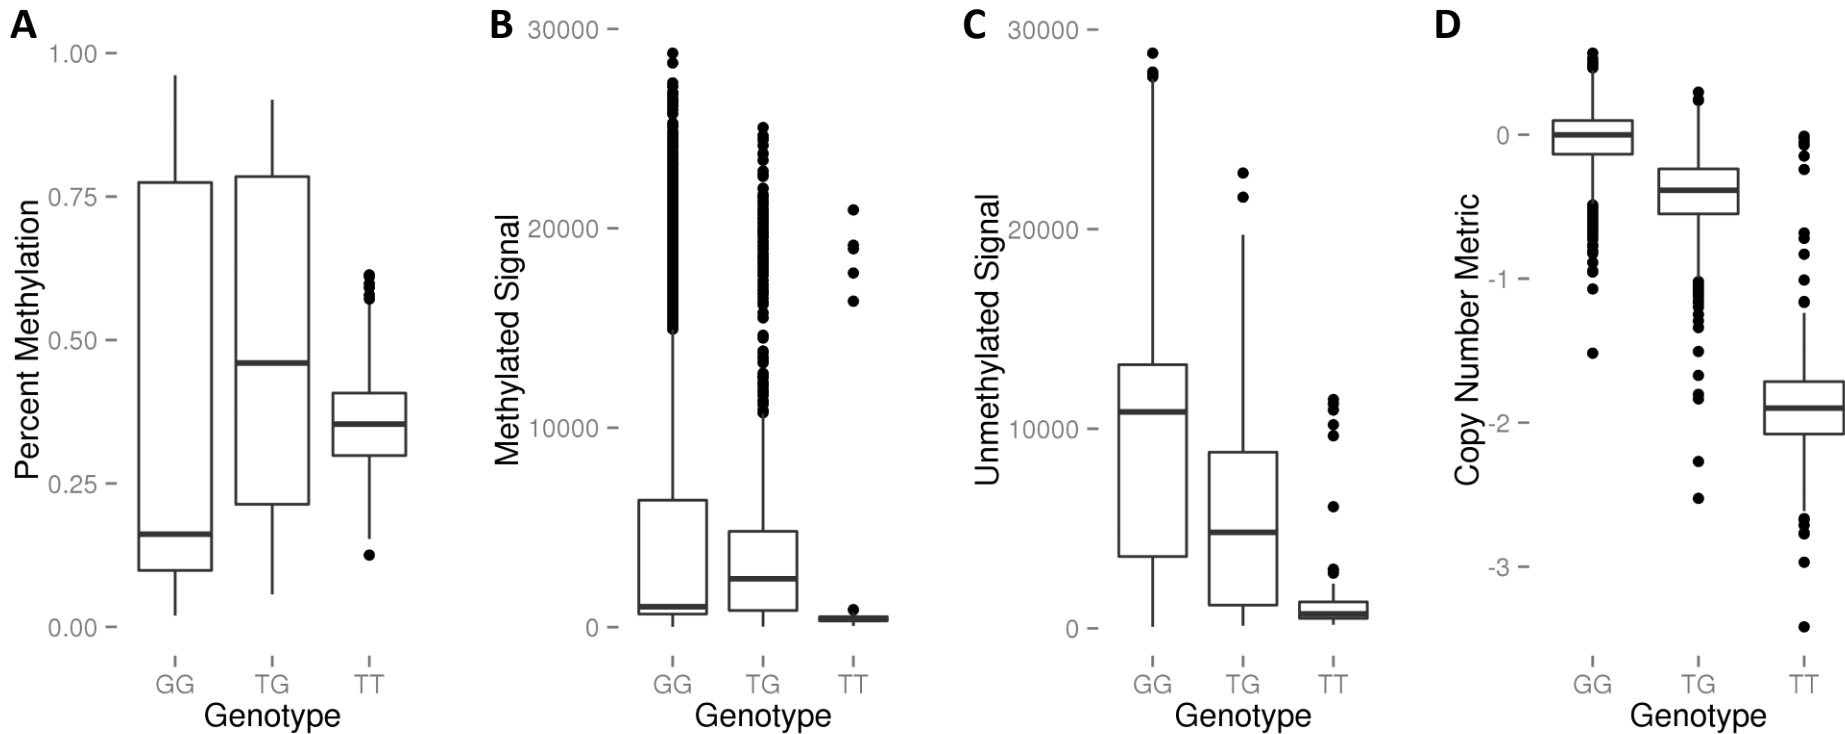

**Figure S22: The effect of a T/G SNP at a positive strand G site of Type I 450k probes on percent methylation, methylated signal, unmethylated signal, and a copy number metric. 27 probes in SEED were classified in this specific scenario. **Panel A:** Percent methylation (beta value) vs. genotype. **Panel B:** Methylated signal vs genotype. **Panel C:** Unmethylated signal vs genotype. **Panel D:** Copy number metric (see Methods for calculation) vs. genotype.**

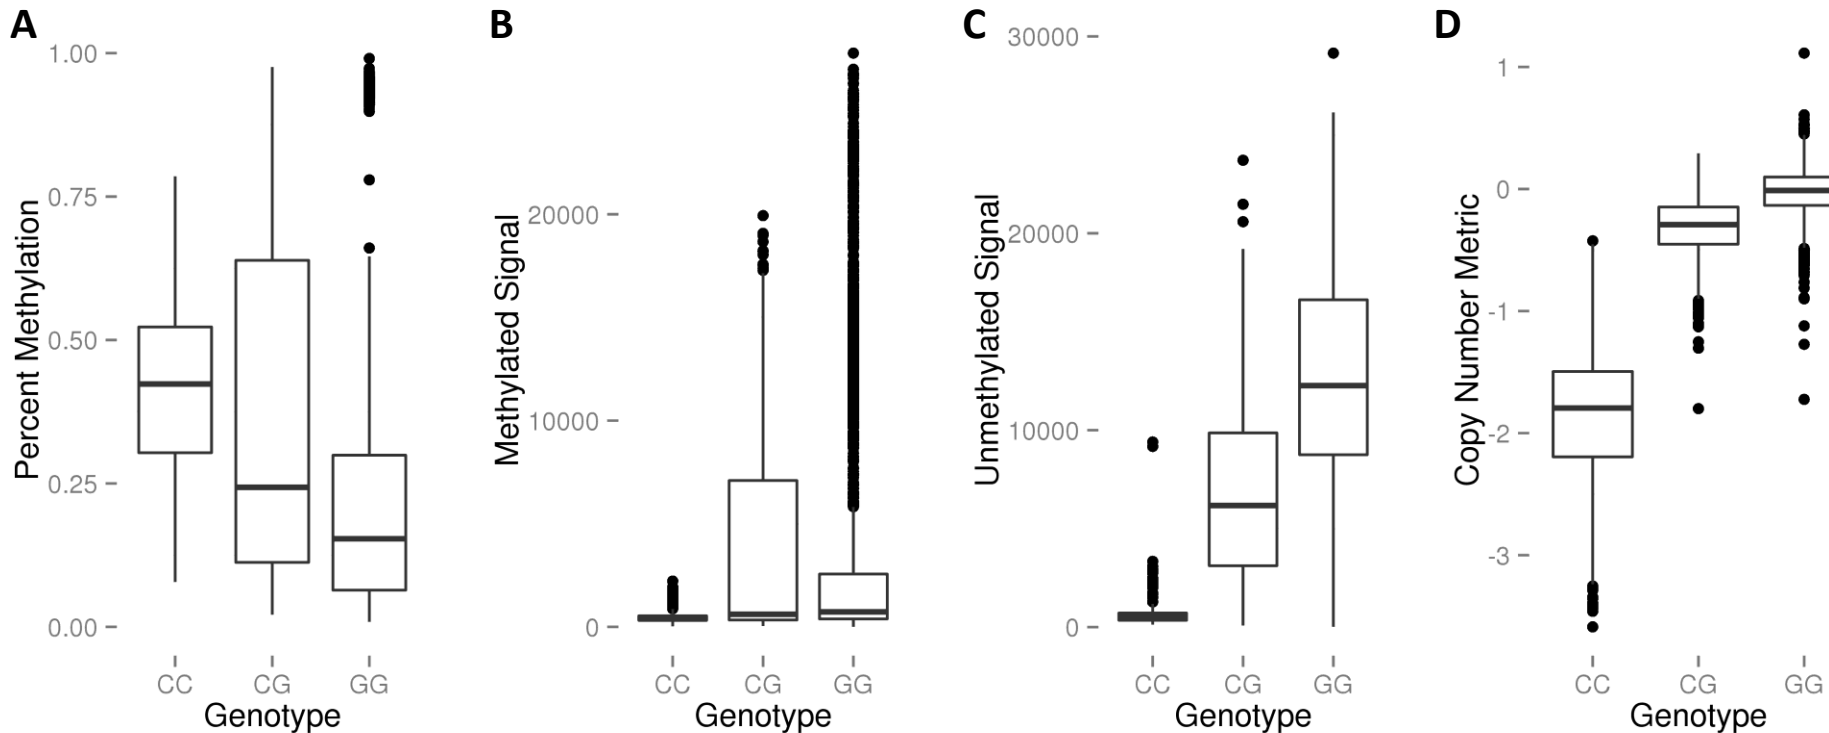

**Figure S23: The effect of a C/G SNP at a negative strand G site of Type I 450k probes on percent methylation, methylated signal, unmethylated signal, and a copy number metric. 30 probes in SEED were classified in this specific scenario. **Panel A:** Percent methylation (beta value) vs. genotype. **Panel B:** Methylated signal vs genotype. **Panel C:** Unmethylated signal vs genotype. **Panel D:** Copy number metric (see Methods for calculation) vs. genotype.**

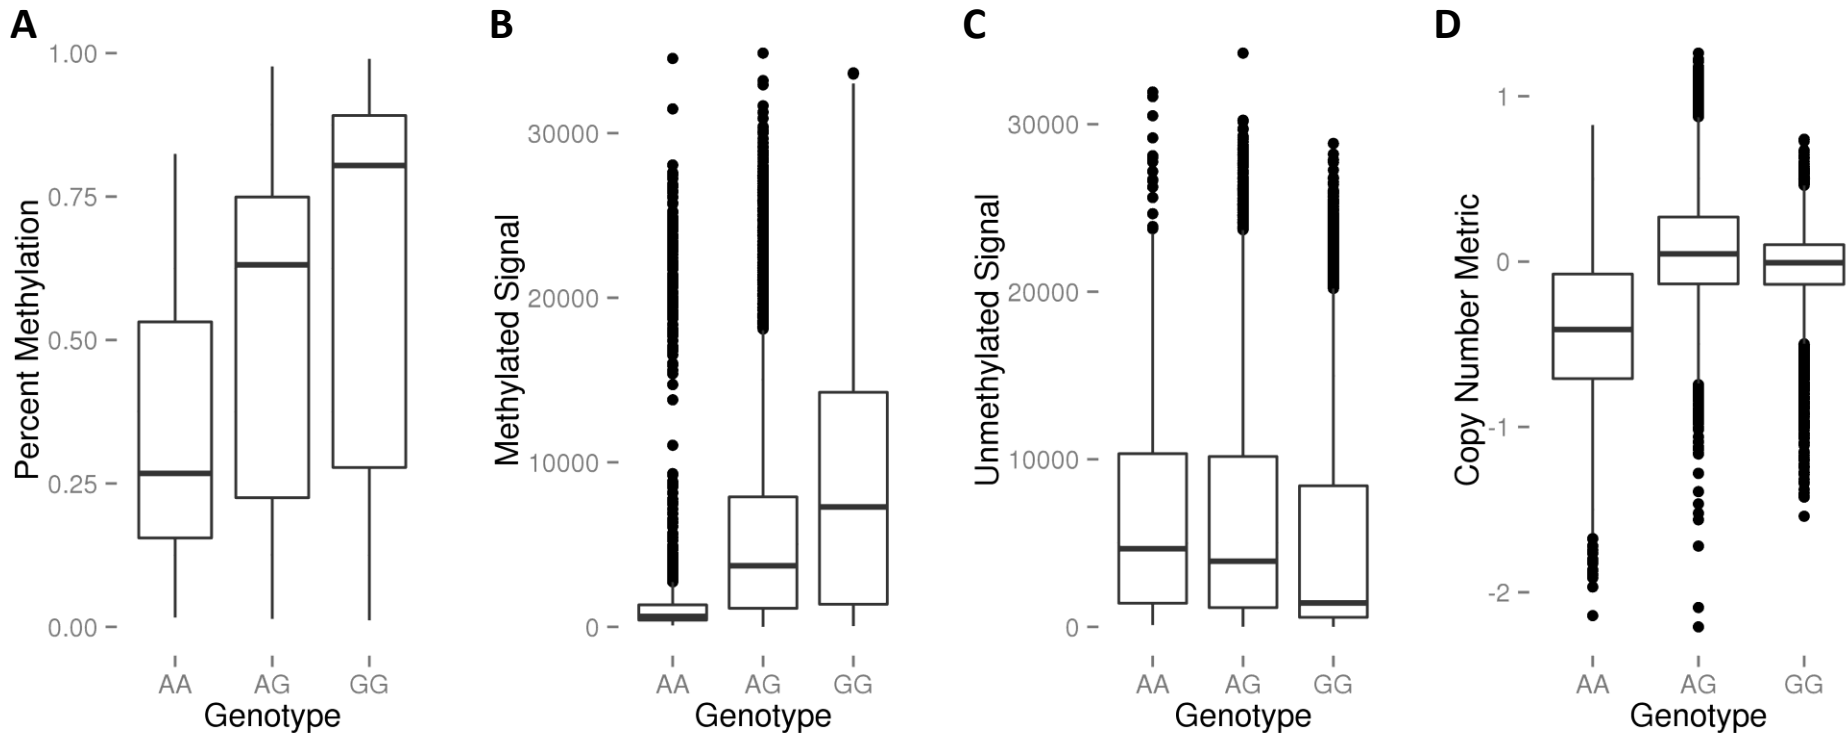

**Figure S24: The effect of a A/G SNP at a negative strand G site of Type I 450k probes on percent methylation, methylated signal, unmethylated signal, and a copy number metric.** 180 probes in SEED were classified in this specific scenario. **Panel A:** Percent methylation (beta value) vs. genotype. **Panel B:** Methylated signal vs genotype. **Panel C:** Unmethylated signal vs genotype. **Panel D:** Copy number metric (see Methods for calculation) vs. genotype.

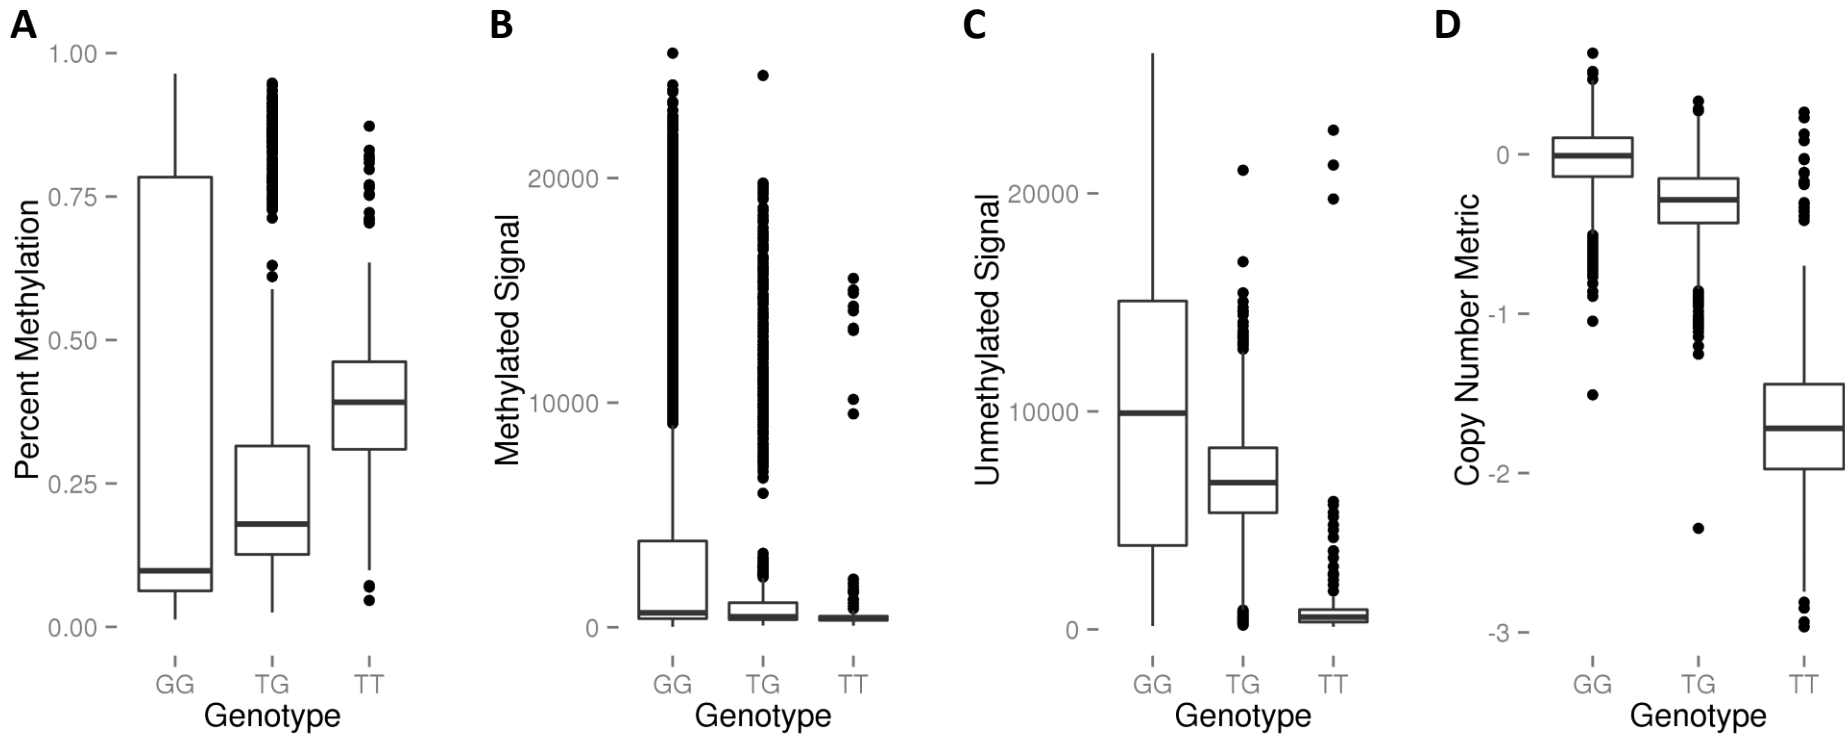

**Figure S25: The effect of a T/G SNP at a negative strand G site of Type I 450k probes on percent methylation, methylated signal, unmethylated signal, and a copy number metric.** 34 probes in SEED were classified in this specific scenario. **Panel A:** Percent methylation (beta value) vs. genotype. **Panel B:** Methylated signal vs genotype. **Panel C:** Unmethylated signal vs genotype. **Panel D:** Copy number metric (see Methods for calculation) vs. genotype.
